# Supplementary material
Source: PubMed Central journal article supplement (PMC3838149)
Supplement: JVI.02656-13_zjv999098345so1.pdf [file JVI.02656-13_zjv999098345so1.pdf]

## Supplemental Materials

# **Phylogenomic Network and Comparative Genomics Reveals a Diverged Member of the $\Phi$ KZ-related group, Marine *Vibrio* phage JM-2012**

Ho Bin Jang, Fernand F. Fagutao, Seong Won Nho, Seong Bin Park, In Seok Cha, Jong Earn Yu, Jung Seok Lee, Se Pyeong Im, Takashi Aoki and Tae Sung Jung

This file contains

Supplementary Table S1-S3

**Table S1. Putative open reading frames (ORFs) of  $\Phi$ JM-2012.** Putative functions of ORFs of  $\Phi$ JM-2012 (only best hits with probability >90% and/or E-value <10<sup>-4</sup> are included), transcription terminators (loops are in red color and stems in blue one), and promoters are presented.

| ORF                                                                                                                                         | Query     |       |       |        |        | HHpred best matches |                                               |                    |         |                                  | BLASTp best matches   |                                    |
|---------------------------------------------------------------------------------------------------------------------------------------------|-----------|-------|-------|--------|--------|---------------------|-----------------------------------------------|--------------------|---------|----------------------------------|-----------------------|------------------------------------|
|                                                                                                                                             | Size (aa) | Start | Stop  | Strand | GC (%) | PDB <sup>a</sup>    | Description                                   | P <sup>b</sup> (%) | E-value | HMM alignment (Q/T) <sup>c</sup> | Putative annotation   | Species                            |
| 1                                                                                                                                           | 233       | 68    | 769   | +      | 34.8   |                     |                                               |                    |         |                                  | Ribonuclease H        | <i>Pseudomonas</i> phage phiKZ     |
| 2                                                                                                                                           | 136       | 753   | 1163  | +      | 32.4   | 3k8u                | Putative ABC transporter                      | 99.9               | 1.7e-22 | 2-132/5-143                      | ORF0015, hypothetical | <i>Shigella</i> phage phiSboM-AG3  |
| 3                                                                                                                                           | 317       | 1174  | 2127  | +      | 37.3   | 4edh                | DTMP kinase                                   | 99.9               | 3.9e-32 | 1-216/3-209                      | Possible dTMP kinase  | <i>Anaerococcus</i> tetradius      |
| Promoter P4 (range: 2130-2149, strand: +) [TATTATATCTATATATTATA]                                                                            |           |       |       |        |        |                     |                                               |                    |         |                                  |                       |                                    |
| 4                                                                                                                                           | 143       | 2260  | 2691  | +      | 32.6   |                     |                                               |                    |         |                                  |                       |                                    |
| 5                                                                                                                                           | 94        | 2693  | 2977  | +      | 33.3   |                     |                                               |                    |         |                                  |                       |                                    |
| 6                                                                                                                                           | 297       | 2993  | 3886  | +      | 36.7   |                     |                                               |                    |         |                                  |                       |                                    |
| 7                                                                                                                                           | 173       | 3949  | 4470  | +      | 33.9   |                     |                                               |                    |         |                                  |                       |                                    |
| 8                                                                                                                                           | 861       | 4575  | 7160  | +      | 32.6   | 3auy                | RAD50 ATPase                                  | 99.93              | 5.4e-24 | 14-840/3-368                     | ORF165, hypothetical  | <i>Pseudomonas</i> phage phiKZ     |
| 9                                                                                                                                           | 121       | 7150  | 7515  | +      | 33.6   |                     |                                               |                    |         |                                  |                       |                                    |
| Promoter P10 (range: 7523-7542, strand: +) [ATTTACACTCCTATATTATA]                                                                           |           |       |       |        |        |                     |                                               |                    |         |                                  |                       |                                    |
| 10                                                                                                                                          | 151       | 7791  | 8246  | +      | 34.9   |                     |                                               |                    |         |                                  |                       |                                    |
| 11                                                                                                                                          | 118       | 8321  | 8677  | +      | 37.8   |                     |                                               |                    |         |                                  |                       |                                    |
| 12                                                                                                                                          | 76        | 8692  | 8922  | +      | 34.2   |                     |                                               |                    |         |                                  |                       |                                    |
| Transcription terminator (range: 8927-8970, strand: -, stability $\Delta$ G: -13.60) [ATCAAAAAAGAGTAGCCCGAAGGCTACTCTTTTTAACCCGTA]           |           |       |       |        |        |                     |                                               |                    |         |                                  |                       |                                    |
| Transcription terminator (range: 8929-8971, strand: +, stability $\Delta$ G: -17.40) [CGGGTTAAAAAGAGTAGCCTTCGGGCTACTCTTTTTTTTGATC]          |           |       |       |        |        |                     |                                               |                    |         |                                  |                       |                                    |
| 13                                                                                                                                          | 439       | 8993  | 10312 | -      | 39.0   |                     |                                               |                    |         |                                  |                       |                                    |
| 14                                                                                                                                          | 448       | 10423 | 11769 | -      | 40.7   |                     |                                               |                    |         |                                  |                       |                                    |
| 15                                                                                                                                          | 210       | 11819 | 12451 | -      | 35.7   |                     |                                               |                    |         |                                  |                       |                                    |
| 16                                                                                                                                          | 300       | 12455 | 13357 | -      | 36.0   |                     |                                               |                    |         |                                  | ORF152, structural    | <i>Pseudomonas</i> phage 201phi2-1 |
| 17                                                                                                                                          | 348       | 13385 | 14431 | -      | 38.9   |                     |                                               |                    |         |                                  | ORF089, structural    | <i>Pseudomonas</i> phage phiKZ     |
| 18                                                                                                                                          | 382       | 14488 | 15636 | -      | 38.1   |                     |                                               |                    |         |                                  | ORF150, structural    | <i>Pseudomonas</i> phage 201phi2-1 |
| 19                                                                                                                                          | 960       | 15652 | 18534 | -      | 33.3   |                     |                                               |                    |         |                                  | ORF149, structural    | <i>Pseudomonas</i> phage 201phi2-1 |
| 20                                                                                                                                          | 506       | 18583 | 20103 | -      | 36.3   |                     |                                               |                    |         |                                  |                       |                                    |
| 21                                                                                                                                          | 105       | 20110 | 20427 | -      | 34.0   |                     |                                               |                    |         |                                  |                       |                                    |
| 22                                                                                                                                          | 140       | 20446 | 20868 | -      | 34.0   |                     |                                               |                    |         |                                  |                       |                                    |
| 23                                                                                                                                          | 426       | 20876 | 22156 | -      | 37.7   | 4aw6                | CAAX prenyl protease 1, ZMPSTE24              | 100.0              | 1e-41   | 52-352/188-481                   | ORF045, structural    | <i>Salmonella</i> phage SPN3US     |
| 24                                                                                                                                          | 574       | 22233 | 23957 | +      | 35.9   | 3iay                | DNA polymerase delta catalytic subunit        | 100.0              | 6.6e-66 | 1-573/43-607                     | ORF044, hypothetical  | <i>Salmonella</i> phage SPN3US     |
| 25                                                                                                                                          | 51        | 23991 | 24146 | +      | 32.7   |                     |                                               |                    |         |                                  |                       |                                    |
| 26                                                                                                                                          | 178       | 24237 | 24773 | +      | 33.0   |                     |                                               |                    |         |                                  |                       |                                    |
| 27                                                                                                                                          | 117       | 24782 | 25135 | +      | 37.9   |                     |                                               |                    |         |                                  |                       |                                    |
| 28                                                                                                                                          | 239       | 25183 | 25902 | -      | 39.0   |                     |                                               |                    |         |                                  |                       |                                    |
| Promoter P29 (range: 25987-26006, strand: +) [GATTACATCTATATATTATA]                                                                         |           |       |       |        |        |                     |                                               |                    |         |                                  |                       |                                    |
| 29                                                                                                                                          | 156       | 26054 | 26524 | +      | 33.5   |                     |                                               |                    |         |                                  |                       |                                    |
| 30                                                                                                                                          | 130       | 26524 | 26916 | +      | 33.6   |                     |                                               |                    |         |                                  |                       |                                    |
| Transcription terminator (range: 26917-26962, strand: -, stability $\Delta$ G: -14.00) [GAAGTTAAATAGACCACGACGTAATGTCGTGGTCTATTATTATGTT]     |           |       |       |        |        |                     |                                               |                    |         |                                  |                       |                                    |
| Transcription terminator (range: 26917-26966, strand: +, stability $\Delta$ G: -12.80) [AACATAATAATAGACCACGACATTACGTCGTGGTCTaTTTAACTTCGATT] |           |       |       |        |        |                     |                                               |                    |         |                                  |                       |                                    |
| 31                                                                                                                                          | 413       | 26974 | 28215 | -      | 36.4   | 2a6h                | DNA-directed RNA polymerase $\beta$ ' subunit | 100.0              | 3.5e-75 | 47-407/801-1248                  | ORF139, hypothetical  | <i>Pseudomonas</i> phage 201phi2-1 |
| 32                                                                                                                                          | 277       | 28212 | 29045 | -      | 33.7   |                     |                                               |                    |         |                                  |                       |                                    |
| 33                                                                                                                                          | 134       | 29193 | 29597 | +      | 37.8   |                     |                                               |                    |         |                                  |                       |                                    |

|                                                                                                                                 |     |       |       |   |      |      |                                      |       |         |               |                            |                                        |
|---------------------------------------------------------------------------------------------------------------------------------|-----|-------|-------|---|------|------|--------------------------------------|-------|---------|---------------|----------------------------|----------------------------------------|
| 34                                                                                                                              | 517 | 29600 | 31153 | + | 35.2 |      |                                      |       |         |               | ORF077, hypothetical       | <i>Pseudomonas</i> phage phiPA3        |
| 35                                                                                                                              | 115 | 31192 | 31539 | + | 32.5 |      |                                      |       |         |               |                            |                                        |
| Promoter P36 (range: 31592-31611, strand: +) [ATTTATACCTATATATAATA]                                                             |     |       |       |   |      |      |                                      |       |         |               |                            |                                        |
| 36                                                                                                                              | 342 | 31819 | 32847 | + | 42.2 |      |                                      |       |         |               |                            |                                        |
| 37                                                                                                                              | 543 | 32909 | 34540 | + | 36.6 |      |                                      |       |         |               | ORF139, hypothetical       | <i>Pseudomonas</i> phage phiPA3        |
| 38                                                                                                                              | 768 | 34811 | 37117 | + | 36.8 |      |                                      |       |         |               |                            |                                        |
| 39                                                                                                                              | 215 | 37253 | 37900 | + | 36.0 |      |                                      |       |         |               |                            |                                        |
| 40                                                                                                                              | 177 | 37972 | 38505 | + | 32.4 |      |                                      |       |         |               |                            |                                        |
| 41                                                                                                                              | 203 | 38502 | 39113 | + | 32.2 |      |                                      |       |         |               |                            |                                        |
| Transcription terminator (range: 39136-39182, strand: +, stability ΔG: -12.00) [GCGACTTAAAGAGTAGGGTGTGAACCCTACTTCTTTTTTTTTTACT] |     |       |       |   |      |      |                                      |       |         |               |                            |                                        |
| 42                                                                                                                              | 807 | 39186 | 41609 | - | 36.0 |      |                                      |       |         |               | ORF148, structural         | <i>Pseudomonas</i> phage phiPA3        |
| 43                                                                                                                              | 626 | 41782 | 43662 | + | 32.1 |      |                                      |       |         |               | Kinase-associated domain I | <i>Pseudomonas</i> phage phiKZ         |
| 44                                                                                                                              | 288 | 43662 | 44528 | + | 36.4 |      |                                      |       |         |               | ORF139, hypothetical       | <i>Pseudomonas</i> phage phiKZ         |
| 45                                                                                                                              | 198 | 44528 | 45124 | + | 36.3 | lhj  | Holliday junction resolvase          | 98.7  | 3.6e-09 | 1-181/1-148   |                            |                                        |
| 46                                                                                                                              | 191 | 45099 | 45674 | + | 37.8 |      |                                      |       |         |               |                            |                                        |
| 47                                                                                                                              | 161 | 45682 | 46167 | + | 38.9 |      |                                      |       |         |               |                            |                                        |
| Transcription terminator (range: 46172-46214, strand: +, stability ΔG: -11.50) [ATTATATAAGAAGCTGGGGTAATTCCTAGTCTTATTGACCC]      |     |       |       |   |      |      |                                      |       |         |               |                            |                                        |
| 48                                                                                                                              | 331 | 47031 | 48026 | + | 34.1 | lyre | Hypothetical protein PA3270          | 96.6  | 0.024   | 15-142/16-148 | ORF082, hypothetical       | <i>Yersinia</i> phage phiR1-37         |
| 49                                                                                                                              | 123 | 48054 | 48425 | + | 37.9 |      |                                      |       |         |               |                            |                                        |
| 50                                                                                                                              | 163 | 49079 | 49570 | + | 29.9 |      |                                      |       |         |               |                            |                                        |
| 51                                                                                                                              | 199 | 49592 | 50191 | + | 37.8 | 2nr7 | Secretion activator protein          | 100.0 | 3.6e-57 | 4-196/5-194   | Hypothetical CR3_210       | <i>Cronobacter</i> phage CR3           |
| Transcription terminator (range: 50197-50238, strand: -, stability ΔG: -12.20) [ATAATAATCAACCTACCGATATCGGTAGGTTGATTATTATCT]     |     |       |       |   |      |      |                                      |       |         |               |                            |                                        |
| Transcription terminator (range: 50199-50239, strand: +, stability ΔG: -12.20) [ATAATAATCAACCTACCGATATCGGTAGGTTGATTATTATC]      |     |       |       |   |      |      |                                      |       |         |               |                            |                                        |
| 52                                                                                                                              | 245 | 50249 | 50986 | - | 33.1 |      |                                      |       |         |               | Hypothetical protein       | <i>Methylosinus trichosporium</i> OB3b |
| 53                                                                                                                              | 702 | 50991 | 53099 | - | 35.4 | lzmB | Acetylxyylan esterase related enzyme | 100.0 | 2.3e-43 | 316-599/2-268 | Hypothetical protein       | <i>Methylosinus trichosporium</i> OB3b |
| Transcription terminator (range: 53117-53159, strand: +, stability ΔG: -11.10) [TAATCGGGTAACTGGGTAFTTTTTTACCCAGTTATTTATAATA]    |     |       |       |   |      |      |                                      |       |         |               |                            |                                        |
| 54                                                                                                                              | 933 | 53169 | 55970 | - | 36.9 | 2vpt | Lipolytic enzyme; esterase           | 99.79 | 4.2e-19 | 644-932/2-199 | Hypothetical Arad_2315     | <i>Argobacterium radiobacter</i> K84   |
| 55                                                                                                                              | 292 | 55970 | 56848 | - | 34.4 |      |                                      |       |         |               | ORF154, structural         | <i>Pseudomonas</i> phage phiPA3        |
| 56                                                                                                                              | 243 | 56862 | 57593 | - | 36.6 | 2xgf | Long tail fiber protein P37          | 94.1  | 0.05    | 183-241/29-80 | ORF153, structural         | <i>Pseudomonas</i> phage phiPA3        |
| Promoter P57 (range: 57644-57663, strand: +) [AAATACATCTATATATTATA]                                                             |     |       |       |   |      |      |                                      |       |         |               |                            |                                        |
| 57                                                                                                                              | 199 | 57719 | 58318 | + | 30.8 |      |                                      |       |         |               |                            |                                        |
| 58                                                                                                                              | 528 | 58387 | 59973 | + | 38.5 | 1kp8 | Groel protein                        | 100.0 | 4e-105  | 6-524/2-527   | Chaperonin GroEL           | <i>Cardiobacterium hominis</i>         |
| Transcription terminator (range: 59979-60021, strand: +, stability ΔG: -11.60) [TATAAAAATAGAGTGGCTTCGAGCTACTCTTTTTTTGTTT]       |     |       |       |   |      |      |                                      |       |         |               |                            |                                        |
| 59                                                                                                                              | 347 | 60059 | 61102 | + | 32.5 |      |                                      |       |         |               |                            |                                        |
| 60                                                                                                                              | 89  | 61136 | 61405 | - | 38.5 |      |                                      |       |         |               |                            |                                        |
| 61                                                                                                                              | 434 | 61470 | 62774 | + | 34.9 |      |                                      |       |         |               | ORF243, structural         | <i>Pseudomonas</i> phage 201phi2-1     |
| 62                                                                                                                              | 200 | 62776 | 63378 | + | 32.5 |      |                                      |       |         |               | ORF245, hypothetical       | <i>Pseudomonas</i> phage 201phi2-1     |
| 63                                                                                                                              | 143 | 63418 | 63849 | - | 35.0 |      |                                      |       |         |               |                            |                                        |
| 64                                                                                                                              | 278 | 63871 | 64707 | - | 34.2 |      |                                      |       |         |               |                            |                                        |
| 65                                                                                                                              | 485 | 64814 | 66271 | + | 38.6 | 3io5 | RECA like protein                    | 99.91 | 1.7e-23 | 27-406/7-312  | ORF175, UvsX protein       | <i>Pseudomonas</i> phage phiPA3        |
| 66                                                                                                                              | 92  | 66292 | 66570 | + | 36.6 |      |                                      |       |         |               |                            |                                        |
| 67                                                                                                                              | 223 | 66580 | 67251 | + | 36.0 |      |                                      |       |         |               | ORF149, hypothetical       | <i>Pseudomonas</i> phage phiKZ         |
| 68                                                                                                                              | 238 | 67273 | 67989 | + | 33.5 |      |                                      |       |         |               | ORF170, hypothetical       | <i>Pseudomonas</i> phage phiPA3        |
| Promoter P69 (range: 67992-68011, strand: +) [TATTACATCTATATATTATA]                                                             |     |       |       |   |      |      |                                      |       |         |               |                            |                                        |

|                                                                                                                                           |      |        |        |   |      |      |                                             |       |          |                  |  |  |                               |                      |  |  |  |                                |                                    |
|-------------------------------------------------------------------------------------------------------------------------------------------|------|--------|--------|---|------|------|---------------------------------------------|-------|----------|------------------|--|--|-------------------------------|----------------------|--|--|--|--------------------------------|------------------------------------|
| 69                                                                                                                                        | 157  | 68046  | 68519  | + | 30.2 |      |                                             |       |          |                  |  |  |                               |                      |  |  |  |                                |                                    |
| 70                                                                                                                                        | 308  | 68534  | 69460  | + | 34.5 |      |                                             |       |          |                  |  |  |                               |                      |  |  |  |                                |                                    |
| 71                                                                                                                                        | 89   | 69462  | 69731  | + | 33.0 |      |                                             |       |          |                  |  |  |                               |                      |  |  |  |                                |                                    |
| 72                                                                                                                                        | 247  | 69748  | 70491  | + | 38.2 |      |                                             |       |          |                  |  |  |                               |                      |  |  |  |                                |                                    |
| 73                                                                                                                                        | 131  | 70463  | 70858  | + | 31.1 |      |                                             |       |          |                  |  |  |                               |                      |  |  |  |                                |                                    |
| 74                                                                                                                                        | 699  | 70948  | 73047  | + | 37.7 |      |                                             |       |          |                  |  |  | ORF182, hypothetical          |                      |  |  |  | <i>Pseudomonas</i> phage phiKZ |                                    |
| 75                                                                                                                                        | 2278 | 73093  | 79929  | - | 36.9 | 3t21 | Murein lytic transglycosylase               | 99.78 | 9.7e-24  | 1939-2102/17-204 |  |  | Lytic murein transglycosylase |                      |  |  |  | <i>Bacillus</i> sp. m3-13      |                                    |
| 76                                                                                                                                        | 1292 | 80126  | 84004  | + | 35.1 | 2a6h | DNA-directed RNA polymerase $\beta$ subunit | 100.0 | 9.4e-120 | 675-1290/253-910 |  |  | ORF178, hypothetical          |                      |  |  |  | <i>Pseudomonas</i> phage phiKZ |                                    |
| 77                                                                                                                                        | 60   | 84001  | 84183  | + | 33.9 |      |                                             |       |          |                  |  |  |                               |                      |  |  |  |                                |                                    |
| 78                                                                                                                                        | 464  | 84187  | 85581  | + | 36.3 |      |                                             |       |          |                  |  |  |                               |                      |  |  |  |                                |                                    |
| 79                                                                                                                                        | 233  | 85593  | 86294  | + | 35.3 |      |                                             |       |          |                  |  |  |                               |                      |  |  |  |                                |                                    |
| 80                                                                                                                                        | 267  | 86297  | 87100  | + | 39.4 |      |                                             |       |          |                  |  |  |                               |                      |  |  |  |                                |                                    |
| Promoter P81 (range: 87150-87169, strand: +) [TTTATAACCCCTATATTATA]                                                                       |      |        |        |   |      |      |                                             |       |          |                  |  |  |                               |                      |  |  |  |                                |                                    |
| 81                                                                                                                                        | 135  | 87219  | 87626  | + | 31.6 |      |                                             |       |          |                  |  |  |                               |                      |  |  |  |                                |                                    |
| 82                                                                                                                                        | 346  | 87663  | 88703  | - | 31.8 |      |                                             |       |          |                  |  |  |                               |                      |  |  |  |                                |                                    |
| Promoter P83 (range: 88767-88786, strand: +) [AAATACACCTATATATTATA]                                                                       |      |        |        |   |      |      |                                             |       |          |                  |  |  |                               |                      |  |  |  |                                |                                    |
| 83                                                                                                                                        | 87   | 88829  | 89092  | + | 29.9 |      |                                             |       |          |                  |  |  |                               |                      |  |  |  |                                |                                    |
| 84                                                                                                                                        | 149  | 89089  | 89538  | + | 34.0 |      |                                             |       |          |                  |  |  |                               |                      |  |  |  |                                |                                    |
| 85                                                                                                                                        | 116  | 89540  | 89890  | + | 31.3 |      |                                             |       |          |                  |  |  |                               | ORF174, hypothetical |  |  |  |                                | <i>Pseudomonas</i> phage phiPA3    |
| 86                                                                                                                                        | 144  | 89950  | 90384  | + | 32.4 |      |                                             |       |          |                  |  |  |                               |                      |  |  |  |                                |                                    |
| 87                                                                                                                                        | 118  | 90381  | 90737  | + | 34.5 |      |                                             |       |          |                  |  |  |                               |                      |  |  |  |                                |                                    |
| 88                                                                                                                                        | 203  | 90749  | 91360  | + | 35.1 |      |                                             |       |          |                  |  |  |                               |                      |  |  |  |                                |                                    |
| 89                                                                                                                                        | 356  | 91386  | 92456  | + | 32.6 | 2hvq | Hypothetical protein in GP24-HOC            | 100.0 | 1.8e-56  | 4-352/2-329      |  |  | RnlB RNA ligase 2             |                      |  |  |  |                                | <i>Salmonella</i> phage PVP-SE1    |
| 90                                                                                                                                        | 163  | 92477  | 92968  | + | 30.5 |      |                                             |       |          |                  |  |  |                               |                      |  |  |  |                                |                                    |
| 91                                                                                                                                        | 249  | 93052  | 93801  | + | 36.4 |      |                                             |       |          |                  |  |  |                               |                      |  |  |  |                                |                                    |
| 92                                                                                                                                        | 154  | 93785  | 94249  | + | 34.2 |      |                                             |       |          |                  |  |  |                               |                      |  |  |  |                                |                                    |
| 93                                                                                                                                        | 427  | 94256  | 95539  | + | 35.2 | 3maj | DNA processing chain A                      | 100.0 | 2.2e-35  | 4-237/95-366     |  |  | Hypothetical protein          |                      |  |  |  |                                | <i>Paenibacillus</i> sp. HGF7      |
| Promoter P94 (range: 95597-95616, strand: +) [ATTTATAAGCCTATATTATA]                                                                       |      |        |        |   |      |      |                                             |       |          |                  |  |  |                               |                      |  |  |  |                                |                                    |
| 94                                                                                                                                        | 262  | 95706  | 96494  | + | 33.3 |      |                                             |       |          |                  |  |  |                               |                      |  |  |  |                                |                                    |
| Transcription terminator (range: 96494-96541, strand: -, stability $\Delta$ G: -10.90) [ATAATTATATACTACCTACTCATTACGAGTAGGTAGTATATTATACGT] |      |        |        |   |      |      |                                             |       |          |                  |  |  |                               |                      |  |  |  |                                |                                    |
| 95                                                                                                                                        | 295  | 96556  | 97443  | - | 38.0 | 1hw4 | Thymidylate synthase                        | 100.0 | 3.2e-96  | 1-295/72-355     |  |  | Thymidylate synthase          |                      |  |  |  |                                | <i>Haemophilus parainfluenza</i>   |
| 96                                                                                                                                        | 140  | 97529  | 97951  | + | 32.2 |      |                                             |       |          |                  |  |  | Hypothetical protein          |                      |  |  |  |                                | <i>Roseovarius</i> sp. 217 phage 1 |
| 97                                                                                                                                        | 131  | 97972  | 98367  | + | 36.9 |      |                                             |       |          |                  |  |  |                               |                      |  |  |  |                                |                                    |
| 98                                                                                                                                        | 190  | 98354  | 98926  | + | 30.0 |      |                                             |       |          |                  |  |  |                               |                      |  |  |  |                                |                                    |
| 99                                                                                                                                        | 289  | 98957  | 99826  | - | 35.3 |      |                                             |       |          |                  |  |  |                               | ORF008, hypothetical |  |  |  |                                | <i>Salmonella</i> phage SPN3U5     |
| 100                                                                                                                                       | 191  | 100156 | 100731 | + | 33.9 |      |                                             |       |          |                  |  |  |                               |                      |  |  |  |                                |                                    |
| 101                                                                                                                                       | 172  | 100761 | 101279 | - | 31.2 |      |                                             |       |          |                  |  |  |                               |                      |  |  |  |                                |                                    |
| 102                                                                                                                                       | 312  | 101372 | 102310 | + | 39.3 | 3r4v | PhuZ; <i>Pseudomonas</i> 201 $\Phi$ 2-1     | 100.0 | 2.0e-47  | 1-311/3-314      |  |  | ORF016, hypothetical          |                      |  |  |  |                                | <i>Pseudomonas</i> phage phiEL     |
| Promoter P103 (range: 102357-102376, strand: +) [ATTTACAACCTATATATTATA]                                                                   |      |        |        |   |      |      |                                             |       |          |                  |  |  |                               |                      |  |  |  |                                |                                    |
| 103                                                                                                                                       | 219  | 102415 | 103074 | + | 31.7 |      |                                             |       |          |                  |  |  |                               |                      |  |  |  |                                |                                    |
| 104                                                                                                                                       | 117  | 103081 | 103434 | + | 32.8 |      |                                             |       |          |                  |  |  |                               |                      |  |  |  |                                |                                    |
| 105                                                                                                                                       | 93   | 103425 | 103706 | + | 33.0 |      |                                             |       |          |                  |  |  |                               |                      |  |  |  |                                |                                    |
| 106                                                                                                                                       | 38   | 103848 | 103964 | + | 41.0 |      |                                             |       |          |                  |  |  |                               |                      |  |  |  |                                |                                    |
| 107                                                                                                                                       | 116  | 103968 | 104318 | + | 35.6 | 1opc | OMPR, OMPC; transcription regulation        | 92.50 | 0.16     | 39-116/9-104     |  |  |                               |                      |  |  |  |                                |                                    |
| 108                                                                                                                                       | 94   | 104311 | 104595 | + | 37.5 |      |                                             |       |          |                  |  |  |                               |                      |  |  |  |                                |                                    |



|                                                                                                                                |     |        |        |   |      |      |                                          |       |         |                 |                                 |  |  |  |  |  |  |  |                              |  |
|--------------------------------------------------------------------------------------------------------------------------------|-----|--------|--------|---|------|------|------------------------------------------|-------|---------|-----------------|---------------------------------|--|--|--|--|--|--|--|------------------------------|--|
| 145                                                                                                                            | 196 | 137829 | 138419 | + | 33.5 |      |                                          |       |         |                 |                                 |  |  |  |  |  |  |  |                              |  |
| 146                                                                                                                            | 199 | 138416 | 139015 | + | 33.7 |      |                                          |       |         |                 |                                 |  |  |  |  |  |  |  |                              |  |
| Promoter P147 (range: 139080-139099, strand: +) [TTTACACCTATATATCATT]                                                          |     |        |        |   |      |      |                                          |       |         |                 |                                 |  |  |  |  |  |  |  |                              |  |
| 147                                                                                                                            | 147 | 139158 | 139601 | + | 31.8 |      |                                          |       |         |                 |                                 |  |  |  |  |  |  |  |                              |  |
| 148                                                                                                                            | 369 | 139614 | 140723 | + | 33.1 | 3g06 | SSPH2; leucine-rich repeat protein       | 92.64 | 0.0019  | 32-270/31-267   |                                 |  |  |  |  |  |  |  |                              |  |
| 149                                                                                                                            | 271 | 140751 | 141566 | + | 34.3 | 3cvr | Invasion plasmid antigen;IpaH3           | 99.87 | 4.3e-21 | 42-220/59-243   | Leucine-rich repeat protein     |  |  |  |  |  |  |  | Salmonella enterica BAA-1581 |  |
| 150                                                                                                                            | 251 | 141597 | 142352 | + | 33.1 | 1j15 | YOPM; leucine-rich repeat                | 99.84 | 4.7e-07 | 17-246/85-326   |                                 |  |  |  |  |  |  |  |                              |  |
| 151                                                                                                                            | 500 | 142427 | 143929 | + | 35.2 |      |                                          |       |         |                 | ORF062, hypothetical            |  |  |  |  |  |  |  | Pseudomonas phage phiPA3     |  |
| 152                                                                                                                            | 509 | 143913 | 145442 | + | 38.4 |      |                                          |       |         |                 | ORF063, hypothetical            |  |  |  |  |  |  |  | Pseudomonas phage phiPA3     |  |
| 153                                                                                                                            | 398 | 145499 | 146695 | + | 37.4 |      |                                          |       |         |                 | ORF064, hypothetical            |  |  |  |  |  |  |  | Pseudomonas phage phiPA3     |  |
| 154                                                                                                                            | 148 | 146783 | 147229 | + | 34.0 |      |                                          |       |         |                 |                                 |  |  |  |  |  |  |  |                              |  |
| 155                                                                                                                            | 140 | 147230 | 147652 | + | 34.5 |      |                                          |       |         |                 |                                 |  |  |  |  |  |  |  |                              |  |
| 156                                                                                                                            | 109 | 147714 | 148043 | - | 32.4 |      |                                          |       |         |                 |                                 |  |  |  |  |  |  |  |                              |  |
| Promoter P157 (range: 148046-148065, strand: +) [TTTATACCTATATATTATA]                                                          |     |        |        |   |      |      |                                          |       |         |                 |                                 |  |  |  |  |  |  |  |                              |  |
| 157                                                                                                                            | 671 | 148136 | 150151 | + | 38.2 | 3lu0 | DNA-directed RNA polymerase β subunit    | 100.0 | 2e-130  | 4-663/660-1338  | ORF129, hypothetical            |  |  |  |  |  |  |  | Pseudomonas phage 201phi2-1  |  |
| 158                                                                                                                            | 662 | 150151 | 152139 | + | 36.8 | 2a6h | DNA-directed RNA polymerase β ' subunit  | 100.0 | 2.1e-78 | 73-426/904-1286 | DNA-directed RNA polymerase (β) |  |  |  |  |  |  |  | Pseudomonas phage phiKZ      |  |
| 159                                                                                                                            | 44  | 152293 | 152427 | + | 35.6 |      |                                          |       |         |                 |                                 |  |  |  |  |  |  |  |                              |  |
| 160                                                                                                                            | 470 | 152608 | 154020 | + | 35.0 | 2db3 | ATP-dependent DNA helicase UVSW          | 100.0 | 1.1e-36 | 38-456/60-490   | ORF075                          |  |  |  |  |  |  |  | Pseudomonas phage phiEL      |  |
| 161                                                                                                                            | 164 | 154138 | 154632 | + | 38.0 |      |                                          |       |         |                 |                                 |  |  |  |  |  |  |  |                              |  |
| 162                                                                                                                            | 84  | 154645 | 154899 | + | 32.5 |      |                                          |       |         |                 |                                 |  |  |  |  |  |  |  |                              |  |
| 163                                                                                                                            | 136 | 154930 | 155340 | + | 34.8 |      |                                          |       |         |                 |                                 |  |  |  |  |  |  |  |                              |  |
| Transcription terminator (range: 155450-155493, strand: +, stability ΔG: -17.40) [TAAAAAAAAAGAGTAGCCTTCGGGCTACTCTTTTGGCTGCTGC] |     |        |        |   |      |      |                                          |       |         |                 |                                 |  |  |  |  |  |  |  |                              |  |
| Transcription terminator (range: 155452-155494, strand: +, stability ΔG: -13.60) [AGCAGCAAAAAGAGTAGCCGGAAGGCTACTCTTTTTTTTTAC]  |     |        |        |   |      |      |                                          |       |         |                 |                                 |  |  |  |  |  |  |  |                              |  |
| 164                                                                                                                            | 702 | 155514 | 157622 | - | 40.7 |      |                                          |       |         |                 |                                 |  |  |  |  |  |  |  |                              |  |
| 165                                                                                                                            | 193 | 157662 | 158243 | - | 34.5 |      |                                          |       |         |                 |                                 |  |  |  |  |  |  |  |                              |  |
| 166                                                                                                                            | 516 | 158260 | 159810 | + | 36.2 | 3bgw | DNAB-like replicative helicase           | 100.0 | 6.1e-49 | 29-494/30-443   | ORF197, DnaB helicase           |  |  |  |  |  |  |  | Pseudomonas phage 201phi2-1  |  |
| 167                                                                                                                            | 293 | 159836 | 160717 | + | 35.9 |      |                                          |       |         |                 |                                 |  |  |  |  |  |  |  |                              |  |
| 168                                                                                                                            | 183 | 160738 | 161289 | + | 33.9 |      |                                          |       |         |                 |                                 |  |  |  |  |  |  |  |                              |  |
| 169                                                                                                                            | 203 | 161282 | 161893 | + | 33.8 | 3kbb | Phosphorylated carbohydrates phosphatase | 99.9  | 1.5e-21 | 20-203/1-200    | ORF248, hypothetical            |  |  |  |  |  |  |  | Salmonella phage SPN3U5      |  |
| 170                                                                                                                            | 359 | 161929 | 163008 | - | 34.5 |      |                                          |       |         |                 | ORF249, hypothetical            |  |  |  |  |  |  |  | Pseudomonas phage 201phi2-1  |  |
| 171                                                                                                                            | 434 | 163161 | 164465 | - | 34.2 |      |                                          |       |         |                 | ORF106, structural              |  |  |  |  |  |  |  | Pseudomonas phage phiPA3     |  |
| 172                                                                                                                            | 206 | 164481 | 165101 | - | 35.9 |      |                                          |       |         |                 |                                 |  |  |  |  |  |  |  |                              |  |
| 173                                                                                                                            | 444 | 165116 | 166450 | - | 36.2 |      |                                          |       |         |                 | ORF104, structural              |  |  |  |  |  |  |  | Pseudomonas phage phiPA3     |  |

<sup>a</sup>PDB, Protein Data Bank; <sup>b</sup>Probability is the most sensitive measure, a value > 95% indicates almost certain homology; <sup>c</sup>Q/T, Query/Template.

**Table S2.** Summary of pair-wise relationship of  $\Phi$ JM-2012 using the ACALME database.

| Query | MGE ID/Name/Type                   | Hosts                             | FuncAnnot              | E-value  | Ident (%) | ProtFamilies | GbkAnnot                        |
|-------|------------------------------------|-----------------------------------|------------------------|----------|-----------|--------------|---------------------------------|
| ORF1  | mge:163/phiKZ/virus                | <i>Pseudomonas aeruginosa</i>     |                        | 1.00E-10 | 31        | F:v_p:763    | ORF155                          |
| ORF3  | mge:1500/phiEL/virus               | <i>Pseudomonas aeruginosa</i>     |                        | 1.00E-07 | 29        | F:v_p:5814   | putative thymidylate kinase     |
| ORF8  | mge:163/phiKZ/virus                | <i>Pseudomonas aeruginosa</i>     |                        | 2.00E-49 | 23        | F:v_p:5808   | ORF165                          |
| ORF8  | mge:1500/phiEL/virus               | <i>Pseudomonas aeruginosa</i>     |                        | 1.00E-23 | 22        | F:v_p:5808   | hypothetical protein            |
| ORF17 | mge:163/phiKZ/virus                | <i>Pseudomonas aeruginosa</i>     |                        | 6.00E-18 | 25        | F:v_p:5791   | ORF089                          |
| ORF17 | mge:1500/phiEL/virus               | <i>Pseudomonas aeruginosa</i>     |                        | 2.00E-15 | 27        | F:v_p:5791   | hypothetical protein            |
| ORF18 | mge:163/phiKZ/virus                | <i>Pseudomonas aeruginosa</i>     |                        | 1.00E-29 | 28        | F:v_p:5790   | ORF088                          |
| ORF18 | mge:1500/phiEL/virus               | <i>Pseudomonas aeruginosa</i>     |                        | 8.00E-18 | 26        | F:v_p:5790   | hypothetical protein            |
| ORF19 | mge:163/phiKZ/virus                | <i>Pseudomonas aeruginosa</i>     |                        | 9.00E-61 | 23        | F:v_p:5789   | ORF087                          |
| ORF19 | mge:1500/phiEL/virus               | <i>Pseudomonas aeruginosa</i>     |                        | 5.00E-26 | 18        | F:v_p:5789   | hypothetical protein            |
| ORF23 | mge:163/phiKZ/virus                | <i>Pseudomonas aeruginosa</i>     |                        | 2.00E-11 | 24        | F:v_p:14261  | ORF084                          |
| ORF24 | mge:163/phiKZ/virus                | <i>Pseudomonas aeruginosa</i>     |                        | 2.00E-42 | 33        | F:v_p:5788   | ORF082                          |
| ORF24 | mge:1500/phiEL/virus               | <i>Pseudomonas aeruginosa</i>     |                        | 2.00E-35 | 23        | F:v_p:5788   | hypothetical protein            |
| ORF31 | mge:1500/phiEL/virus               | <i>Pseudomonas aeruginosa</i>     |                        | 2.00E-30 | 27        | F:v_p:5787   | hypothetical protein            |
| ORF31 | mge:163/phiKZ/virus                | <i>Pseudomonas aeruginosa</i>     |                        | 3.00E-30 | 28        | F:v_p:5787   | ORF080                          |
| ORF34 | mge:163/phiKZ/virus                | <i>Pseudomonas aeruginosa</i>     |                        | 4.00E-15 | 22        | F:v_p:5786   | ORF077                          |
| ORF37 | mge:163/phiKZ/virus                | <i>Pseudomonas aeruginosa</i>     |                        | 9.00E-35 | 25        | F:v_p:5797   | ORF123                          |
| ORF37 | mge:1500/phiEL/virus               | <i>Pseudomonas aeruginosa</i>     |                        | 7.00E-13 | 21        | F:v_p:5797   | hypothetical protein            |
| ORF42 | mge:163/phiKZ/virus                | <i>Pseudomonas aeruginosa</i>     |                        | 2.00E-32 | 23        | F:v_p:5799   | ORF129                          |
| ORF42 | mge:1500/phiEL/virus               | <i>Pseudomonas aeruginosa</i>     |                        | 4.00E-07 | 21        | F:v_p:5799   | hypothetical protein            |
| ORF43 | mge:163/phiKZ/virus                | <i>Pseudomonas aeruginosa</i>     |                        | 5.00E-31 | 37        | F:v_p:5798   | ORF128                          |
| ORF43 | mge:1500/phiEL/virus               | <i>Pseudomonas aeruginosa</i>     |                        | 6.00E-22 | 23        | F:v_p:5798   | hypothetical protein            |
| ORF44 | mge:163/phiKZ/virus                | <i>Pseudomonas aeruginosa</i>     |                        | 6.00E-26 | 32        | F:v_p:5801   | ORF139                          |
| ORF44 | mge:1500/phiEL/virus               | <i>Pseudomonas aeruginosa</i>     |                        | 3.00E-18 | 29        | F:v_p:5801   | hypothetical protein            |
| ORF51 | mge:1628/VP882/virus               | <i>Vibrio parahaemolyticus</i>    |                        | 7.00E-14 | 29        | F:v_p:244    | conserved phage-related protein |
| ORF51 | mge:2727/prophinder:43169/prophage | <i>Shewanellasp. W3-18-1</i>      | phage function unknown | 7.00E-13 | 28        | F:v_p:244    | hypothetical protein            |
| ORF51 | mge:182/VHML/ virus                | <i>Vibrio Harveyi</i>             |                        | 3.00E-11 | 28        | F:v_p:244    | ORF19                           |
| ORF51 | mge:2092/prophinder:44877/prophage | <i>Thiomicrospiracrunogena</i>    | phage function unknown | 3.00E-10 | 29        | F:v_p:244    | hypothetical protein            |
| ORF51 | mge:2337/prophinder:43976/prophage | <i>Pectobacteriumatrosepticum</i> | phage function unknown | 7.00E-09 | 29        | F:v_p:244    | hypothetical protein            |
| ORF51 | mge:1586/N4/ virus                 | <i>Escherichia coli</i>           |                        | 4.00E-06 | 25        | F:v_p:244    | N-acetylmuramidase              |
| ORF51 | mge:2516/prophinder:47278/prophage | <i>Acinetobacterbaumannii</i>     | phage function unknown | 1.00E-05 | 27        | F:v_p:244    | hypothetical protein            |
| ORF51 | mge:2517/prophinder:47278/prophage | <i>Acinetobacterbaumannii</i>     | phage function unknown | 2.00E-05 | 27        | F:v_p:244    | hypothetical protein            |
| ORF53 | mge:2661/prophinder:43496/prophage | <i>Acinetobacterbaumannii</i>     |                        | 1.00E-67 | 35        | F:v_p:1992   | hypothetical protein            |
| ORF53 | mge:2138/prophinder:44372/prophage | <i>Pseudomonas putida</i>         |                        | 4.00E-19 | 24        | F:v_p:1992   | hypothetical protein            |
| ORF53 | mge:2139/prophinder:44374/prophage | <i>Pseudomonas putida</i>         |                        | 1.00E-18 | 23        | F:v_p:1992   | hypothetical protein            |
| ORF58 | mge:2667/prophinder:46184/prophage | <i>Nitrobacterwinogradskyi</i>    |                        | 2.00E-61 | 31        | F:v_p:2808   | chaperoninGroEL                 |
| ORF58 | mge:2393/prophinder:42783/prophage | <i>Psychromonasingrahamii</i>     |                        | 1.00E-58 | 31        | F:v_p:2808   | GroEL, large subunit of GroESL  |
| ORF58 | mge:1500/phiEL/virus               | <i>Pseudomonas aeruginosa</i>     |                        | 2.00E-26 | 25        | F:v_p:2808   | GroEL-like chaperonine protein  |
| ORF61 | mge:163/phiKZ/virus                | <i>Pseudomonas aeruginosa</i>     |                        | 1.00E-17 | 22        | F:v_p:5805   | ORF157                          |
| ORF61 | mge:1500/phiEL/virus               | <i>Pseudomonas aeruginosa</i>     |                        | 3.00E-10 | 20        | F:v_p:5805   | hypothetical protein            |
| ORF62 | mge:163/phiKZ/virus                | <i>Pseudomonas aeruginosa</i>     |                        | 2.00E-05 | 24        | F:v_p:5806   | ORF161                          |
| ORF64 | mge:163/phiKZ/virus                | <i>Pseudomonas aeruginosa</i>     |                        | 7.00E-06 | 19        | F:v_p:14300  | ORF153                          |
| ORF65 | mge:163/phiKZ/virus                | <i>Pseudomonas aeruginosa</i>     |                        | 4.00E-50 | 29        | F:v_p:5804   | ORF152                          |
| ORF65 | mge:1500/phiEL/virus               | <i>Pseudomonas aeruginosa</i>     |                        | 3.00E-16 | 24        | F:v_p:5804   | hypothetical protein            |
| ORF67 | mge:163/phiKZ/virus                | <i>Pseudomonas aeruginosa</i>     |                        | 3.00E-25 | 34        | F:v_p:5803   | ORF149                          |
| ORF67 | mge:1500/phiEL/virus               | <i>Pseudomonas aeruginosa</i>     |                        | 3.00E-11 | 24        | F:v_p:5803   | hypothetical protein            |
| ORF68 | mge:163/phiKZ/virus                | <i>Pseudomonas aeruginosa</i>     |                        | 3.00E-08 | 21        | F:v_p:14296  | ORF147                          |

|       |                                    |                                    |                                                                                                                    |           |    |            |                                   |
|-------|------------------------------------|------------------------------------|--------------------------------------------------------------------------------------------------------------------|-----------|----|------------|-----------------------------------|
| ORF74 | mge:163/phiKZ/virus                | <i>Pseudomonas aeruginosa</i>      |                                                                                                                    | 6.00E-44  | 26 | F:v_p:5813 | ORF182                            |
| ORF74 | mge:1500/phiEL/virus               | <i>Pseudomonas aeruginosa</i>      |                                                                                                                    | 8.00E-19  | 28 | F:v_p:5813 | hypothetical protein              |
| ORF75 | mge:13/SPBc2/virus                 | <i>Bacillus subtilis</i>           |                                                                                                                    | 3.00E-23  | 39 | F:v_p:1    | putative transglycosylase         |
| ORF75 | mge:2378/prophinder:45715/prophage | <i>Bacillus subtilis</i>           | phage tail tape measure protein                                                                                    | 3.00E-23  | 39 | F:v_p:1    | hypothetical protein              |
| ORF75 | mge:2343/prophinder:46721/prophage | <i>Erythrobacter litoralis</i>     | lytic transglycosylase; phage DNA translocation                                                                    | 5.00E-21  | 53 | F:v_p:351  | lytic transglycosylase            |
| ORF75 | mge:2339/prophinder:46016/prophage | <i>Acidobacteria bacterium</i>     | lytic transglycosylase; phage DNA translocation                                                                    | 4.00E-18  | 36 | F:v_p:351  | lytic transglycosylase, catalytic |
| ORF75 | mge:1600/PR772/virus               | <i>Salmonella typhimurium</i>      |                                                                                                                    | 9.00E-18  | 53 | F:v_p:351  | transglycosylase                  |
| ORF75 | mge:1526/PR5/virus                 | <i>Salmonella typhimurium</i>      |                                                                                                                    | 6.00E-17  | 51 | F:v_p:351  | transglycosylase                  |
| ORF75 | mge:47/PRD1/virus                  | <i>Escherichia coli</i>            |                                                                                                                    | 6.00E-17  | 51 | F:v_p:351  | transglycosylase                  |
| ORF75 | mge:1663/PR4/virus                 | <i>Salmonella typhimurium</i>      |                                                                                                                    | 1.00E-15  | 47 | F:v_p:351  | transglycosylase                  |
| ORF75 | mge:1464/L17/virus                 | <i>Salmonella typhimurium</i>      |                                                                                                                    | 1.00E-15  | 47 | F:v_p:351  | transglycosylase                  |
| ORF75 | mge:1596/PR3/virus                 | <i>Salmonella typhimurium</i>      |                                                                                                                    | 1.00E-15  | 47 | F:v_p:351  | transglycosylase                  |
| ORF75 | mge:1597/F8/virus                  | <i>Pseudomonas aeruginosa</i>      |                                                                                                                    | 1.00E-13  | 48 | F:v_p:351  | ORF038                            |
| ORF75 | mge:2066/prophinder:43828/prophage | <i>Photorhabdus luminescens</i>    |                                                                                                                    | 4.00E-13  | 43 | F:v_p:2492 | hypothetical protein              |
| ORF75 | mge:2767/prophinder:47162/prophage | <i>Shewanella pealeana</i>         | lytic transglycosylase                                                                                             | 1.00E-12  | 35 | F:v_p:649  | lytic transglycosylase catalytic  |
| ORF75 | mge:2492/prophinder:46883/prophage | <i>Xanthobacter autotrophicus</i>  | phage DNA translocation; lytic transglycosylase                                                                    | 4.00E-12  | 34 | F:v_p:351  | lytic transglycosylase catalytic  |
| ORF75 | mge:2389/prophinder:43931/prophage | <i>Mesorhizobium sp. BNC1</i>      | lytic transglycosylase; phage DNA translocation                                                                    | 4.00E-12  | 37 | F:v_p:351  | lytic transglycosylase, catalytic |
| ORF75 | mge:2040/prophinder:42908/prophage | <i>Clostridium botulinum</i>       | lytic transglycosylase                                                                                             | 5.00E-11  | 34 | F:v_p:649  | SLT domain protein                |
| ORF75 | mge:2638/prophinder:45720/prophage | <i>Clostridium botulinum</i>       | lytic transglycosylase                                                                                             | 5.00E-11  | 34 | F:v_p:649  | SLT domain-containing protein     |
| ORF75 | mge:2205/prophinder:44548/prophage | <i>Clostridium botulinum</i>       | lytic transglycosylase                                                                                             | 5.00E-11  | 34 | F:v_p:649  | SLT domain-containing protein     |
| ORF75 | mge:2162/prophinder:45074/prophage | <i>Shigella dysenteriae</i>        | lytic transglycosylase; phage DNA translocation                                                                    | 7.00E-10  | 29 | F:v_p:351  | putative transglycosylase         |
| ORF75 | mge:2749/prophinder:44935/prophage | <i>Shigella flexneri</i>           | phage DNA translocation; lytic transglycosylase                                                                    | 8.00E-10  | 29 | F:v_p:351  | putative transglycosylase         |
| ORF75 | mge:2687/prophinder:46938/prophage | <i>Shigella flexneri</i>           | phage DNA translocation; lytic transglycosylase                                                                    | 8.00E-10  | 29 | F:v_p:351  | putative transglycosylase         |
| ORF75 | mge:2715/prophinder:46778/prophage | <i>Shigella flexneri</i>           | phage DNA translocation; lytic transglycosylase                                                                    | 8.00E-10  | 29 | F:v_p:351  | putative transglycosylase         |
| ORF75 | mge:163/phiKZ/virus                | <i>Pseudomonas aeruginosa</i>      | lytic transglycosylase                                                                                             | 4.00E-09  | 18 | F:v_p:649  | ORF181                            |
| ORF75 | mge:2595/prophinder:44805/prophage | <i>Enterobacter sp. 638</i>        | phage prohead/capsid assembly; phage DNA translocation; lytic transglycosylase; phage head/capsid internal protein | 4.00E-09  | 37 | F:v_p:102  | lytic transglycosylase, catalytic |
| ORF75 | mge:2254/prophinder:45501/prophage | <i>Magnetospirillum magneticum</i> | phage release by lysis; endolysin activity                                                                         | 3.00E-08  | 36 | F:v_p:380  | hypothetical protein              |
| ORF75 | mge:2562/prophinder:43459/prophage | <i>Pseudomonas putida</i>          | phage prohead/capsid assembly; phage DNA translocation; lytic transglycosylase; phage head/capsid internal protein | 1.00E-07  | 31 | F:v_p:102  | phage internal core protein       |
| ORF75 | mge:31/phiYeO3-12/virus            | <i>Yersinia enterocolitica</i>     |                                                                                                                    | 2.00E-07  | 31 | F:v_p:102  | internal virion protein D         |
| ORF75 | mge:2020/prophinder:47260/prophage | <i>Acinetobacter baumannii</i>     | phage tail tape measure protein                                                                                    | 3.00E-07  | 46 | F:v_p:1    | putative bacteriophage protein    |
| ORF75 | mge:49/T7/virus                    | <i>Escherichia coli</i>            |                                                                                                                    | 5.00E-07  | 33 | F:v_p:102  | internal virion protein D         |
| ORF75 | mge:184/phiA1122/virus             | <i>Yersinia pestis</i>             |                                                                                                                    | 8.00E-07  | 32 | F:v_p:102  | internal virion protein           |
| ORF75 | mge:2436/prophinder:47561/prophage | <i>Salmonella enterica</i>         | phage prohead/capsid assembly; phage DNA translocation; lytic transglycosylase; phage head/capsid internal protein | 9.00E-07  | 34 | F:v_p:102  | hypothetical protein              |
| ORF75 | mge:161/gh-1/virus                 | <i>Pseudomonas putida</i>          |                                                                                                                    | 9.00E-07  | 36 | F:v_p:102  | internal virion protein D         |
| ORF75 | mge:1512/P1/virus                  | <i>Escherichia coli</i>            |                                                                                                                    | 2.00E-06  | 28 | F:v_p:2492 | Sit                               |
| ORF75 | mge:67/T3/virus                    | <i>Escherichia coli</i>            |                                                                                                                    | 3.00E-06  | 31 | F:v_p:102  | internal virion protein D         |
| ORF75 | mge:2093/prophinder:43102/prophage | <i>Campylobacter hominis</i>       |                                                                                                                    | 3.00E-06  | 32 | F:v_p:3636 | regulatory protein dnir           |
| ORF75 | mge:1516/Berlin/virus              | <i>Yersinia pestis</i>             |                                                                                                                    | 5.00E-06  | 34 | F:v_p:102  | Internal virion protein D         |
| ORF75 | mge:2586/prophinder:47421/prophage | <i>Bartonella tribocorum</i>       |                                                                                                                    | 9.00E-05  | 33 | F:v_p:2690 | lytic transglycolase              |
| ORF76 | mge:163/phiKZ/virus                | <i>Pseudomonas aeruginosa</i>      |                                                                                                                    | 1.00E-130 | 31 | F:v_p:3449 | ORF178                            |
| ORF76 | mge:1500/phiEL/virus               | <i>Pseudomonas aeruginosa</i>      |                                                                                                                    | 2.00E-61  | 28 | F:v_p:3449 | hypothetical protein              |
| ORF76 | mge:1500/phiEL/virus               | <i>Pseudomonas aeruginosa</i>      |                                                                                                                    | 1.00E-31  | 28 | F:v_p:3449 | hypothetical protein              |
| ORF79 | mge:163/phiKZ/virus                | <i>Pseudomonas aeruginosa</i>      |                                                                                                                    | 2.00E-20  | 26 | F:v_p:5811 | ORF176                            |
| ORF79 | mge:1500/phiEL/virus               | <i>Pseudomonas aeruginosa</i>      |                                                                                                                    | 9.00E-07  | 22 | F:v_p:5811 | hypothetical protein              |



|        |                                     |                                   |                               |          |    |             |                                |
|--------|-------------------------------------|-----------------------------------|-------------------------------|----------|----|-------------|--------------------------------|
| ORF80  | mge:163/phiKZ/virus                 | <i>Pseudomonas aeruginosa</i>     |                               | 5.00E-13 | 28 | F:v_p:5810  | ORF175                         |
| ORF80  | mge:1500/phiEL/virus                | <i>Pseudomonas aeruginosa</i>     |                               | 2.00E-11 | 31 | F:v_p:5810  | hypothetical protein           |
| ORF85  | mge:163/phiKZ/virus                 | <i>Pseudomonas aeruginosa</i>     |                               | 7.00E-15 | 37 | F:v_p:14299 | ORF151                         |
| ORF93  | mge:119/KVP40/virus                 | <i>Vibrio parahaemolyticus</i>    |                               | 5.00E-10 | 35 | F:v_p:485   | conserved hypothetical protein |
| ORF93  | mge:149/Bxz2/virus                  | <i>Mycobacterium smegmatis</i>    |                               | 5.00E-09 | 33 | F:v_p:485   | gp62                           |
| ORF93  | mge:1656/Che12/virus                | <i>Mycobacterium tuberculosis</i> |                               | 1.00E-08 | 36 | F:v_p:485   | gp66                           |
| ORF93  | mge:1466/C-St/virus                 | <i>Clostridium botulinum</i>      |                               | 3.00E-08 | 36 | F:v_p:485   | putative guanylate kinase      |
| ORF93  | mge:52/D29/virus                    | <i>Mycobacterium tuberculosis</i> |                               | 5.00E-08 | 34 | F:v_p:485   | hypothetical protein           |
| ORF93  | mge:89/L5/virus                     | <i>Mycobacterium tuberculosis</i> |                               | 1.00E-07 | 33 | F:v_p:485   | predicted 14.2 protein         |
| ORF93  | mge:2386/prophinder:42520/prophage  | <i>Shewanellabaltica</i>          |                               | 8.00E-06 | 23 | F:v_p:2806  | oligoribonuclease              |
| ORF95  | mge:2672/prophinder:42587/prophage  | <i>Rhizobium leguminosarum</i>    | thymidylate synthase activity | 1.00E-31 | 31 | F:v_p:273   | thymidylate synthase           |
| ORF95  | mge:1667/RB43/virus                 | <i>Enterobacteriaceae</i>         |                               | 2.00E-26 | 30 | F:v_p:273   | Td thymidylatesynthetase       |
| ORF95  | mge:142/T4/virus                    | <i>Escherichia coli</i>           |                               | 4.00E-25 | 31 | F:v_p:273   | dTMP (thymidylate) synthase    |
| ORF95  | mge:1474/Aeh1/virus                 | <i>Aeromonashydrophila</i>        |                               | 1.00E-24 | 31 | F:v_p:273   | dTMP synthase                  |
| ORF95  | mge:1542/RB32/virus                 | <i>Enterobacteriaceae</i>         |                               | 2.00E-24 | 31 | F:v_p:273   | thymidylatesynthetase          |
| ORF95  | mge:2002/JS98/virus                 | <i>Escherichia coli</i>           |                               | 2.00E-24 | 30 | F:v_p:273   | dTMPthymidylate synthase       |
| ORF95  | mge:119/KVP40/virus                 | <i>Vibrio parahaemolyticus</i>    |                               | 3.00E-24 | 32 | F:v_p:273   | dTMP (thymidylate) synthase    |
| ORF95  | mge:1580/31/virus                   | <i>Aeromonassalmonicida</i>       |                               | 4.00E-24 | 29 | F:v_p:273   | dTMP (thymidylate) synthase    |
| ORF95  | mge:1892/Geobacillus virus E2/virus | <i>Geobacillus</i>                |                               | 8.00E-24 | 29 | F:v_p:273   | putative thymidylate synthase  |
| ORF95  | mge:1582/44R2.8t/virus              | <i>Aeromonassalmonicida</i>       |                               | 2.00E-23 | 29 | F:v_p:273   | dTMP (thymidylate) synthase    |
| ORF95  | mge:140/RB69/virus                  | <i>Escherichia coli</i>           |                               | 2.00E-23 | 30 | F:v_p:273   | dTMP (thymidylate) synthase    |
| ORF95  | mge:1488/25/virus                   | <i>Aeromonassalmonicida</i>       |                               | 7.00E-23 | 29 | F:v_p:273   | thymidylatesynthetase          |
| ORF95  | mge:1504/T5/virus                   | <i>Escherichia coli</i>           |                               | 1.00E-18 | 29 | F:v_p:273   | putative thymidylate synthase  |
| ORF95  | mge:2262/prophinder:43410/prophage  | <i>Staphylococcus epidermidis</i> | thymidylate synthase activity | 3.00E-15 | 24 | F:v_p:273   | thymidylate synthase           |
| ORF95  | mge:1561/Felix01/virus              | <i>Salmonella</i>                 |                               | 2.00E-13 | 25 | F:v_p:273   | Thymidylate synthase           |
| ORF95  | mge:1885/phiEF24C/virus             | <i>Enterococcus faecalis</i>      |                               | 8.00E-12 | 29 | F:v_p:273   | putative thymidylate synthase  |
| ORF95  | mge:139/RB49/virus                  | <i>Escherichia coli</i>           |                               | 3.00E-06 | 27 | F:v_p:273   | dTMP (thymidylate) synthase    |
| ORF96  | mge:122/PY54/virus                  | <i>Yersinia enterocolitica</i>    |                               | 8.00E-31 | 48 | F:v_p:851   | hypothetical protein           |
| ORF96  | mge:52/D29/virus                    | <i>Mycobacterium tuberculosis</i> |                               | 9.00E-31 | 57 | F:v_p:851   | gp64                           |
| ORF96  | mge:155/Omega/virus                 | <i>Mycobacterium smegmatis</i>    |                               | 1.00E-29 | 57 | F:v_p:851   | gp120                          |
| ORF96  | mge:89/L5/virus                     | <i>Mycobacterium tuberculosis</i> |                               | 9.00E-29 | 53 | F:v_p:851   | predicted 14.0Kd protein       |
| ORF96  | mge:1656/Che12/virus                | <i>Mycobacterium tuberculosis</i> |                               | 6.00E-28 | 53 | F:v_p:851   | gp70                           |
| ORF96  | mge:1623/Twort/virus                | <i>Staphylococcus aureus</i>      |                               | 6.00E-15 | 37 | F:v_p:851   | ORF101                         |
| ORF96  | mge:109/Sfi21/virus                 | <i>Streptococcus thermophilus</i> |                               | 9.00E-14 | 35 | F:v_p:851   | Hypothetical protein           |
| ORF96  | mge:2702/prophinder:43072/prophage  | <i>Lactococcuslactis</i>          | phage function unknown        | 1.00E-11 | 39 | F:v_p:851   | prophage pi1 protein 29        |
| ORF96  | mge:21/bIL309/virus                 | <i>Lactococcuslactis</i>          |                               | 1.00E-11 | 39 | F:v_p:851   | Orf34                          |
| ORF96  | mge:105/7201/virus                  | <i>Streptococcus thermophilus</i> |                               | 1.00E-05 | 35 | F:v_p:851   | ORF14                          |
| ORF99  | mge:163/phiKZ/virus                 | <i>Pseudomonas aeruginosa</i>     |                               | 4.00E-20 | 29 | F:v_p:5779  | ORF042                         |
| ORF99  | mge:1500/phiEL/virus                | <i>Pseudomonas aeruginosa</i>     |                               | 1.00E-11 | 25 | F:v_p:5779  | hypothetical protein           |
| ORF102 | mge:1500/phiEL/virus                | <i>Pseudomonas aeruginosa</i>     |                               | 1.00E-14 | 27 | F:v_p:5778  | hypothetical protein           |
| ORF102 | mge:163/phiKZ/virus                 | <i>Pseudomonas aeruginosa</i>     |                               | 1.00E-12 | 24 | F:v_p:5778  | ORF039                         |
| ORF110 | mge:163/phiKZ/virus                 | <i>Pseudomonas aeruginosa</i>     |                               | 7.00E-06 | 31 | F:v_p:14240 | ORF049                         |
| ORF112 | mge:163/phiKZ/virus                 | <i>Pseudomonas aeruginosa</i>     |                               | 5.00E-25 | 27 | F:v_p:5776  | ORF030                         |
| ORF112 | mge:1500/phiEL/virus                | <i>Pseudomonas aeruginosa</i>     |                               | 2.00E-08 | 21 | F:v_p:5776  | hypothetical protein           |
| ORF113 | mge:163/phiKZ/virus                 | <i>Pseudomonas aeruginosa</i>     |                               | 3.00E-30 | 23 | F:v_p:5775  | ORF029                         |
| ORF113 | mge:1500/phiEL/virus                | <i>Pseudomonas aeruginosa</i>     |                               | 9.00E-13 | 23 | F:v_p:5775  | hypothetical protein           |
| ORF116 | mge:163/phiKZ/virus                 | <i>Pseudomonas aeruginosa</i>     |                               | 2.00E-35 | 25 | F:v_p:5773  | ORF026                         |
| ORF116 | mge:1500/phiEL/virus                | <i>Pseudomonas aeruginosa</i>     |                               | 3.00E-21 | 24 | F:v_p:5773  | hypothetical protein           |
| ORF117 | mge:163/phiKZ/virus                 | <i>Pseudomonas aeruginosa</i>     | helicase activity             | 2.00E-95 | 30 | F:v_p:686   | ORF025                         |
| ORF117 | mge:1500/phiEL/virus                | <i>Pseudomonas aeruginosa</i>     | helicase activity             | 5.00E-46 | 27 | F:v_p:686   | ATP-dependent DNA helicase     |
| ORF119 | mge:163/phiKZ/virus                 | <i>Pseudomonas aeruginosa</i>     |                               | 4.00E-70 | 32 | F:v_p:5812  | ORF180                         |

|        |                                    |                               |                                                                         |          |    |             |                             |
|--------|------------------------------------|-------------------------------|-------------------------------------------------------------------------|----------|----|-------------|-----------------------------|
| ORF119 | mge:1500/phiEL/virus               | <i>Pseudomonas aeruginosa</i> |                                                                         | 2.00E-64 | 35 | F:v_p:5812  | hypothetical protein        |
| ORF129 | mge:1500/phiEL/virus               | <i>Pseudomonas aeruginosa</i> |                                                                         | 5.00E-37 | 26 | F:v_p:5777  | hypothetical protein        |
| ORF129 | mge:163/phiKZ/virus                | <i>Pseudomonas aeruginosa</i> |                                                                         | 6.00E-29 | 23 | F:v_p:5777  | ORF032                      |
| ORF132 | mge:163/phiKZ/virus                | <i>Pseudomonas aeruginosa</i> |                                                                         | 3.00E-68 | 27 | F:v_p:5780  | ORF050                      |
| ORF132 | mge:1500/phiEL/virus               | <i>Pseudomonas aeruginosa</i> |                                                                         | 4.00E-42 | 24 | F:v_p:5780  | hypothetical protein        |
| ORF134 | mge:163/phiKZ/virus                | <i>Pseudomonas aeruginosa</i> |                                                                         | 2.00E-08 | 17 | F:v_p:5792  | ORF098                      |
| ORF136 | mge:163/phiKZ/virus                | <i>Pseudomonas aeruginosa</i> |                                                                         | 1.00E-22 | 26 | F:v_p:5781  | ORF055                      |
| ORF140 | mge:163/phiKZ/virus                | <i>Pseudomonas aeruginosa</i> |                                                                         | 7.00E-31 | 28 | F:v_p:5783  | ORF065                      |
| ORF140 | mge:1500/phiEL/virus               | <i>Pseudomonas aeruginosa</i> |                                                                         | 1.00E-22 | 31 | F:v_p:5783  | hypothetical protein        |
| ORF141 | mge:163/phiKZ/virus                | <i>Pseudomonas aeruginosa</i> |                                                                         | 7.00E-13 | 34 | F:v_p:5784  | ORF066                      |
| ORF141 | mge:1500/phiEL/virus               | <i>Pseudomonas aeruginosa</i> |                                                                         | 2.00E-12 | 26 | F:v_p:5784  | hypothetical protein        |
| ORF149 | mge:2718/prophinder:46816/prophage | <i>Shigella flexneri</i>      | interaction with host via protein secreted by type III secretion system | 4.00E-06 | 37 | F:v_p:1198  | invasion plasmid antigen    |
| ORF149 | mge:2315/prophinder:44082/prophage | <i>Shigella boydii</i>        | interaction with host via protein secreted by type III secretion system | 4.00E-06 | 37 | F:v_p:1198  | invasion plasmid antigen    |
| ORF149 | mge:2162/prophinder:45074/prophage | <i>Shigella dysenteriae</i>   | interaction with host via protein secreted by type III secretion system | 5.00E-06 | 23 | F:v_p:1198  | invasion plasmid antigen    |
| ORF149 | mge:2715/prophinder:46778/prophage | <i>Shigella flexneri</i>      | interaction with host via protein secreted by type III secretion system | 5.00E-06 | 23 | F:v_p:1198  | invasion plasmid antigen    |
| ORF149 | mge:2749/prophinder:44935/prophage | <i>Shigella flexneri</i>      | interaction with host via protein secreted by type III secretion system | 5.00E-06 | 23 | F:v_p:1198  | invasion plasmid antigen    |
| ORF149 | mge:2687/prophinder:46938/prophage | <i>Shigella flexneri</i>      | interaction with host via protein secreted by type III secretion system | 5.00E-06 | 23 | F:v_p:1198  | invasion plasmid antigen    |
| ORF151 | mge:163/phiKZ/virus                | <i>Pseudomonas aeruginosa</i> |                                                                         | 4.00E-06 | 22 | F:v_p:14254 | ORF068                      |
| ORF151 | mge:1500/phiEL/virus               | <i>Pseudomonas aeruginosa</i> |                                                                         | 2.00E-05 | 22 | F:v_p:14522 | hypothetical protein        |
| ORF152 | mge:163/phiKZ/virus                | <i>Pseudomonas aeruginosa</i> |                                                                         | 6.00E-07 | 20 | F:v_p:14255 | ORF069                      |
| ORF153 | mge:163/phiKZ/virus                | <i>Pseudomonas aeruginosa</i> |                                                                         | 3.00E-13 | 25 | F:v_p:5785  | ORF070                      |
| ORF153 | mge:1500/phiEL/virus               | <i>Pseudomonas aeruginosa</i> |                                                                         | 3.00E-05 | 22 | F:v_p:5785  | hypothetical protein        |
| ORF157 | mge:163/phiKZ/virus                | <i>Pseudomonas aeruginosa</i> |                                                                         | 2.00E-27 | 27 | F:v_p:3444  | ORF071                      |
| ORF157 | mge:1500/phiEL/virus               | <i>Pseudomonas aeruginosa</i> |                                                                         | 2.00E-20 | 21 | F:v_p:3444  | hypothetical protein        |
| ORF157 | mge:163/phiKZ/virus                | <i>Pseudomonas aeruginosa</i> |                                                                         | 1.00E-09 | 26 | F:v_p:3444  | ORF073                      |
| ORF158 | mge:163/phiKZ/virus                | <i>Pseudomonas aeruginosa</i> | helicase activity                                                       | 2.00E-51 | 28 | F:v_p:686   | ORF074                      |
| ORF158 | mge:1500/phiEL/virus               | <i>Pseudomonas aeruginosa</i> | helicase activity                                                       | 3.00E-11 | 22 | F:v_p:686   | ATP-dependent DNA helicase  |
| ORF160 | mge:1500/phiEL/virus               | <i>Pseudomonas aeruginosa</i> | helicase activity                                                       | 1.00E-29 | 27 | F:v_p:686   | ATP-dependent DNA helicase  |
| ORF160 | mge:163/phiKZ/virus                | <i>Pseudomonas aeruginosa</i> | helicase activity                                                       | 4.00E-28 | 24 | F:v_p:686   | ORF075                      |
| ORF164 | mge:163/phiKZ/virus                | <i>Pseudomonas aeruginosa</i> |                                                                         | 1.00E-23 | 22 | F:v_p:5796  | ORF120                      |
| ORF164 | mge:1500/phiEL/virus               | <i>Pseudomonas aeruginosa</i> |                                                                         | 7.00E-05 | 21 | F:v_p:5796  | hypothetical protein        |
| ORF166 | mge:1500/phiEL/virus               | <i>Pseudomonas aeruginosa</i> |                                                                         | 4.00E-26 | 23 | F:v_p:5795  | hypothetical protein        |
| ORF166 | mge:163/phiKZ/virus                | <i>Pseudomonas aeruginosa</i> |                                                                         | 3.00E-25 | 23 | F:v_p:5795  | ORF118                      |
| ORF170 | mge:163/phiKZ/virus                | <i>Pseudomonas aeruginosa</i> |                                                                         | 2.00E-24 | 28 | F:v_p:5807  | ORF164                      |
| ORF170 | mge:1500/phiEL/virus               | <i>Pseudomonas aeruginosa</i> |                                                                         | 5.00E-07 | 23 | F:v_p:5807  | putative structural protein |
| ORF171 | mge:163/phiKZ/virus                | <i>Pseudomonas aeruginosa</i> |                                                                         | 2.00E-15 | 22 | F:v_p:5794  | ORF101                      |
| ORF171 | mge:1500/phiEL/virus               | <i>Pseudomonas aeruginosa</i> |                                                                         | 2.00E-06 | 21 | F:v_p:5794  | hypothetical protein        |
| ORF173 | mge:163/phiKZ/virus                | <i>Pseudomonas aeruginosa</i> |                                                                         | 5.00E-13 | 22 | F:v_p:5793  | ORF099                      |
| ORF173 | mge:1500/phiEL/virus               | <i>Pseudomonas aeruginosa</i> |                                                                         | 1.00E-09 | 22 | F:v_p:5793  | hypothetical protein        |

**Table S3.** The matrix displaying the list of protein families assigned to  $\Phi$ JM-2012 and  $\Phi$ KZ-related phages (E-value <0.0001).

| Families <sup>a</sup> | Functions <sup>b</sup>                    | Gene product (gp) pairs of $\Phi$ KZ-related phages |                 |              |                |              |             |
|-----------------------|-------------------------------------------|-----------------------------------------------------|-----------------|--------------|----------------|--------------|-------------|
|                       |                                           | $\Phi$ JM-2012                                      | $\Phi$ PA3      | $\Phi$ KZ    | 201 $\phi$ 2-1 | $\Phi$ EL    | $\Phi$ OBP  |
| F:v_p:1 <sup>c</sup>  | Tail tape measure protein                 | ORF75                                               |                 |              |                |              |             |
| F:v_p:20              | Phage capsid assembly                     |                                                     |                 |              |                |              | ORF244      |
| F:v_p:23              | Phage release by lysis                    |                                                     | ORFs166,167,169 | ORF146       | ORF230         | ORF156       |             |
| F:v_p:27              | Deoxyribonuclease I activity              |                                                     | 210             | 56,72,179    |                | 25,185       |             |
| F:v_p:32              | Phage release by lysis                    |                                                     |                 |              |                |              | 279         |
| F:v_p:141             | Phage function unknown                    |                                                     |                 |              | 35             |              |             |
| F:v_p:175             | Ribonucleoside-diphosphate reductase      |                                                     | 378             | 306          | 467            |              |             |
| F:v_p:238             | Thiol-disulfide exchange                  |                                                     |                 |              |                |              | 12          |
| F:v_p:239             | Ribonucleoside-diphosphate reductase      |                                                     | 377             | 305          | 457            |              | 211         |
| F:v_p:243             | Transcription repressor activity          |                                                     |                 |              |                | 163          |             |
| F:v_p:244             | Phage function unknown                    | 51                                                  |                 |              |                |              |             |
| F:v_p:273             | Thymidylate synthase activity             | 95                                                  | 274             | 235          | 350            |              |             |
| F:v_p:318             | Transpositional DNA recombination         |                                                     |                 |              |                | 37           |             |
| F:v_p:400             | Phage release by lysis                    |                                                     |                 |              | 229            |              |             |
| F:v_p:485             | Phage function unknown                    | 93                                                  |                 |              |                |              |             |
| F:v_p:497             | Dihydrofolate reductase activity          |                                                     | 3               | 4            | 3              |              | 241         |
| F:v_p:499             | Thymidine kinase activity                 |                                                     |                 |              |                |              | 249         |
| F:v_p:635             | Phage function unknown                    |                                                     |                 |              |                |              | 61          |
| F:v_p:649             | Lytic transglycosylase activity           |                                                     | 163,213         | 144,181      | 276            | 183          | 149,276     |
| F:v_p:686             | Helicase activity                         | 117,158,160                                         | 7,65,233        | 25,74,75,203 | 5,130,131,300  | 11,39,40,166 | 6,74,84,263 |
| F:v_p:758             | Phage function unknown                    |                                                     |                 |              |                | 100          |             |
| F:v_p:763             | Exoribonuclease H activity                | 1                                                   | 178             | 155          | 240            | 124          | 158         |
| F:v_p:767             | Phage function unknown                    |                                                     | 96,217          | 184          | 280            |              | 60          |
| F:v_p:769             | Phage function unknown                    |                                                     | 88              |              | 147            |              |             |
| F:v_p:820             | Phage function unknown                    |                                                     |                 |              |                | 154          |             |
| F:v_p:851             | Phage function unknown                    | 96                                                  |                 |              |                |              |             |
| F:v_p:933             | DNA binding                               |                                                     |                 | 114          |                |              |             |
| F:v_p:941             | Phage function unknown                    |                                                     |                 |              |                |              | 229         |
| F:v_p:990             | ATPase activity                           |                                                     | 347             | 286          |                |              |             |
| F:v_p:1020            | Phage function unknown                    |                                                     | 5               |              | 4              |              |             |
| F:v_p:1043            | Phage function unknown                    |                                                     |                 |              |                | 15           |             |
| F:v_p:1094            | Phage function unknown                    |                                                     |                 |              |                | 188          |             |
| F:v_p:1133            | Phage function unknown                    |                                                     | 150-154         | 131-135      | 216-220        | 113-115      | 142-144     |
| F:v_p:1182            | dCTP deaminase activity                   |                                                     | 255             | 214          | 331            |              |             |
| F:v_p:1193            | Phage function unknown                    |                                                     | 241             | 245          | 315            |              |             |
| F:v_p:1198            | Protein related type III secretion system | 149                                                 |                 |              |                |              |             |
| F:v_p:1200            | Phage DNA replication                     |                                                     | 257             |              | 333            | 122          | 153         |
| F:v_p:1238            | Phage function unknown                    |                                                     | 249             | 207          | 321            |              |             |
| F:v_p:1607            | Deoxyribonuclease I activity              |                                                     |                 | 296          |                |              |             |
| F:v_p:1860            | Phage function unknown                    |                                                     | 229             | 197          |                |              |             |
| F:v_p:1910            | 5'-3' exonuclease activity                |                                                     |                 | 35           |                |              |             |
| F:v_p:1992            | Not assigned <sup>d</sup>                 | 53                                                  |                 |              |                |              |             |
| F:v_p:2099            | Not assigned                              |                                                     | 164,165         | 145          |                |              |             |
| F:v_p:2808            | Not assigned                              | 58                                                  |                 |              |                | 146          | 246         |
| F:v_p:2944            | Not assigned                              |                                                     |                 |              |                | 125          |             |
| F:v_p:3044            | Not assigned                              |                                                     | 289             |              | 355            |              |             |
| F:v_p:3175            | Not assigned                              |                                                     |                 |              |                |              | 7,98        |
| F:v_p:3184            | Not assigned                              |                                                     |                 |              | 306            |              | 27          |
| F:v_p:3444            | Not assigned                              | 157                                                 |                 | 71,73        | 129            | 38           | 73          |
| F:v_p:3445            | Not assigned                              |                                                     | 80,81,82,83     | 83           | 452,456        | 153          |             |
| F:v_p:3446            | Phage function unknown                    |                                                     | 97,98,99,100    | 93,94,95     | 155,156,157    |              |             |
| F:v_p:3447            | Not assigned                              |                                                     | 116             | 113,115      |                | 85           |             |
| F:v_p:3449            | Not assigned                              | 76                                                  | 211             | 178          | 273,274        | 186,187      | 278         |
| F:v_p:4444            | Not assigned                              |                                                     |                 |              |                | 157          |             |
| F:v_p:4626            | Not assigned                              |                                                     |                 |              |                |              | 161         |
| F:v_p:5409            | Not assigned                              |                                                     | 286             | 40           | 62             |              |             |
| F:v_p:5770            | Not assigned                              |                                                     |                 | 10           |                | 101          |             |
| F:v_p:5771            | Not assigned                              |                                                     |                 | 13           |                | 98           |             |
| F:v_p:5772            | Not assigned                              |                                                     | 122             | 14           |                | 99           |             |
| F:v_p:5773            | Not assigned                              | 116                                                 | 8               | 26           | 27             | 9            | 5           |
| F:v_p:5774            | Not assigned                              |                                                     | 9               | 27           | 28             | 8            | 4           |
| F:v_p:5775            | Not assigned                              | 113                                                 | 11              | 29           | 30             | 6            | 2           |
| F:v_p:5776            | Not assigned                              | 112                                                 | 12              | 30           | 32             | 5            | 1           |
| F:v_p:5777            | Not assigned                              | 129                                                 | 17              | 32           | 36             | 13           | 9           |
| F:v_p:5778            | Not assigned                              | 102                                                 | 28              | 39           | 59             | 16           | 47          |
| F:v_p:5779            | Not assigned                              | 99                                                  | 37              | 42           | 73             | 14           | 10          |
| F:v_p:5780            | Not assigned                              | 132                                                 | 47              | 50           | 83             | 21           | 55          |
| F:v_p:5781            | Not assigned                              | 136                                                 | 54              | 55           | 107            | 24           | 58          |
| F:v_p:5782            | Not assigned                              |                                                     | 55              | 59           | 114            | 27           | 59          |
| F:v_p:5783            | Not assigned                              | 140                                                 | 59              | 65           | 121            | 30           | 65          |
| F:v_p:5784            | Not assigned                              | 141                                                 | 60              | 66           | 122            | 31           | 66          |
| F:v_p:5785            | Not assigned                              | 153                                                 | 64              | 70           | 126            | 35           | 71          |
| F:v_p:5786            | Not assigned                              | 34                                                  | 74              | 77           | 136            | 47           | 93          |
| F:v_p:5787            | Not assigned                              | 31                                                  | 77              | 80           | 139            | 44           | 90          |
| F:v_p:5788            | Not assigned                              | 24                                                  | 85              | 82           | 144            | 51           | 99          |
| F:v_p:5789            | Not assigned                              | 19                                                  | 90              | 87           | 149            | 56           | 104         |
| F:v_p:5790            | Not assigned                              | 18                                                  | 91              | 88           | 150            | 57           | 105         |

|             |              |     |         |         |     |         |     |
|-------------|--------------|-----|---------|---------|-----|---------|-----|
| F:v_p:5791  | Not assigned | 17  | 92      | 89      | 151 | 58      | 106 |
| F:v_p:5792  | Not assigned | 134 | 103     | 98      | 161 | 68      | 118 |
| F:v_p:5793  | Not assigned | 173 | 104     | 99      | 162 | 69      | 119 |
| F:v_p:5794  | Not assigned | 171 | 106     | 101     | 164 | 71      | 121 |
| F:v_p:5795  | Not assigned | 166 | 131,134 | 118     | 197 | 76      | 122 |
| F:v_p:5796  | Not assigned | 164 | 136     | 120     | 200 | 78      | 124 |
| F:v_p:5797  | Not assigned | 37  | 139     | 123     | 203 | 80      | 126 |
| F:v_p:5798  | Not assigned | 43  | 147     | 128     | 213 | 104     | 133 |
| F:v_p:5799  | Not assigned | 42  | 148     | 129     | 214 | 103     | 132 |
| F:v_p:5800  | Not assigned |     | 149     | 130     | 215 | 112     | 141 |
| F:v_p:5801  | Not assigned | 44  | 158     | 139     | 224 | 106     | 135 |
| F:v_p:5802  | Not assigned |     | 159     | 140     | 225 | 108     | 137 |
| F:v_p:5803  | Not assigned | 67  | 172     | 149     | 233 | 175     | 268 |
| F:v_p:5804  | Not assigned | 65  | 175     | 152     | 237 | 173     | 266 |
| F:v_p:5805  | Not assigned | 61  | 181     | 157     | 243 | 169     | 259 |
| F:v_p:5806  | Not assigned | 62  | 185     | 161     | 245 | 168     | 258 |
| F:v_p:5807  | Not assigned | 170 | 189     | 164     | 249 | 117     | 146 |
| F:v_p:5808  | Not assigned | 8   | 190     | 165     | 250 | 118     | 147 |
| F:v_p:5809  | Not assigned |     | 202     | 174     | 261 | 181     | 274 |
| F:v_p:5810  | Not assigned | 80  | 205     | 175     | 268 | 192     | 283 |
| F:v_p:5811  | Not assigned | 79  | 206     | 176     | 269 | 191     | 282 |
| F:v_p:5812  | Not assigned | 119 | 212     | 180     | 275 | 184     | 277 |
| F:v_p:5813  | Not assigned | 74  | 214     | 182     | 277 | 182     | 275 |
| F:v_p:5814  | Not assigned | 3   | 223     | 188     | 287 | 201     |     |
| F:v_p:5815  | Not assigned |     | 253     | 209,250 |     |         |     |
| F:v_p:5817  | Not assigned |     | 306     | 257,258 | 369 |         |     |
| F:v_p:5818  | Not assigned |     | 367     | 297     | 436 | 95      |     |
| F:v_p:5825  | Not assigned |     |         |         |     | 50      |     |
| F:v_p:5826  | Not assigned |     |         |         |     | 137,152 |     |
| F:v_p:5827  | Not assigned |     |         |         |     | 89,92   |     |
| F:v_p:6614  | Not assigned |     |         |         |     |         | 165 |
| F:v_p:10744 | Not assigned |     |         |         |     |         | 214 |
| F:v_p:14206 | Not assigned |     | 1       | 1       | 1   |         |     |
| F:v_p:14207 | Not assigned |     | 2       | 2       | 2   |         |     |
| F:v_p:14208 | Not assigned |     |         | 3       |     |         |     |
| F:v_p:14209 | Not assigned |     |         | 5       | 461 |         |     |
| F:v_p:14210 | Not assigned |     | 320     | 6       | 387 |         |     |
| F:v_p:14211 | Not assigned |     | 117     | 7       |     |         |     |
| F:v_p:14212 | Not assigned |     |         | 8       |     |         |     |
| F:v_p:14213 | Not assigned |     |         | 9       |     |         |     |
| F:v_p:14214 | Not assigned |     |         | 11      | 392 |         |     |
| F:v_p:14215 | Not assigned |     | 113     | 12      |     |         |     |
| F:v_p:14216 | Not assigned |     |         | 15      |     |         |     |
| F:v_p:14217 | Not assigned |     | 331     | 16      |     |         |     |
| F:v_p:14218 | Not assigned |     | 195     | 17      |     |         |     |
| F:v_p:14219 | Not assigned |     |         | 18      |     |         |     |
| F:v_p:14220 | Not assigned |     |         | 19      |     |         |     |
| F:v_p:14221 | Not assigned |     | 118     | 20      |     |         |     |
| F:v_p:14222 | Not assigned |     | 126     | 21      |     |         |     |
| F:v_p:14223 | Not assigned |     | 127     | 22      |     |         |     |
| F:v_p:14224 | Not assigned |     | 128     | 23      |     |         |     |
| F:v_p:14225 | Not assigned |     |         | 24      |     |         |     |
| F:v_p:14226 | Not assigned |     | 10      | 28      | 29  |         |     |
| F:v_p:14227 | Not assigned |     |         | 31      |     |         |     |
| F:v_p:14228 | Not assigned |     |         | 33      |     |         |     |
| F:v_p:14229 | Not assigned |     | 20      | 34      | 48  |         |     |
| F:v_p:14230 | Not assigned |     |         | 36      |     |         |     |
| F:v_p:14231 | Not assigned |     |         | 37      |     |         |     |
| F:v_p:14232 | Not assigned |     | 25      | 38      | 57  |         |     |
| F:v_p:14233 | Not assigned |     | 30      | 41      | 66  |         |     |
| F:v_p:14234 | Not assigned |     | 39      | 43      | 75  |         |     |
| F:v_p:14235 | Not assigned |     |         | 44      |     |         |     |
| F:v_p:14236 | Not assigned |     | 42      | 45      |     |         |     |
| F:v_p:14237 | Not assigned |     |         | 46      |     |         |     |
| F:v_p:14238 | Not assigned |     | 44      | 47      | 79  |         |     |
| F:v_p:14239 | Not assigned |     |         | 48      |     |         |     |
| F:v_p:14240 | Not assigned | 110 | 46      | 49      | 81  |         |     |
| F:v_p:14241 | Not assigned |     |         | 51      |     |         |     |
| F:v_p:14242 | Not assigned |     | 51      | 52      | 98  |         |     |
| F:v_p:14243 | Not assigned |     |         | 53      |     |         |     |
| F:v_p:14244 | Not assigned |     | 53      | 54      | 105 |         |     |
| F:v_p:14246 | Not assigned |     |         | 57      |     |         |     |
| F:v_p:14247 | Not assigned |     |         | 58      |     |         |     |
| F:v_p:14248 | Not assigned |     |         | 60      |     |         |     |
| F:v_p:14249 | Not assigned |     |         | 61      |     |         |     |
| F:v_p:14250 | Not assigned |     | 56      | 62      | 118 |         |     |
| F:v_p:14251 | Not assigned |     | 57      | 63      | 119 |         |     |
| F:v_p:14252 | Not assigned |     | 58      | 64      | 120 |         |     |
| F:v_p:14253 | Not assigned |     |         | 67      | 123 |         |     |
| F:v_p:14254 | Not assigned |     | 61      | 67      | 123 |         |     |
| F:v_p:14255 | Not assigned | 151 | 62      | 68      | 124 |         |     |
| F:v_p:14257 | Not assigned | 152 | 63      | 69      | 125 |         |     |
| F:v_p:14258 | Not assigned |     |         | 76      |     |         |     |
| F:v_p:14259 | Not assigned |     | 75      | 78      | 137 |         |     |
| F:v_p:14260 | Not assigned |     | 76      | 79      | 138 |         |     |
| F:v_p:14261 | Not assigned |     | 79      | 81      | 140 |         |     |
|             |              | 23  | 86      | 84      | 145 | 52      | 100 |

|             |              |     |     |     |     |  |
|-------------|--------------|-----|-----|-----|-----|--|
| F:v_p:14262 | Not assigned | 87  | 85  | 146 |     |  |
| F:v_p:14263 | Not assigned | 89  | 86  | 148 |     |  |
| F:v_p:14264 | Not assigned | 93  | 90  | 152 |     |  |
| F:v_p:14265 | Not assigned | 94  | 91  | 153 |     |  |
| F:v_p:14266 | Not assigned | 95  | 92  | 154 |     |  |
| F:v_p:14267 | Not assigned | 101 | 96  | 158 |     |  |
| F:v_p:14268 | Not assigned | 102 | 97  | 159 |     |  |
| F:v_p:14269 | Not assigned | 105 | 100 | 163 |     |  |
| F:v_p:14270 | Not assigned | 107 | 102 |     |     |  |
| F:v_p:14271 | Not assigned |     | 103 |     |     |  |
| F:v_p:14272 | Not assigned | 108 | 104 | 167 |     |  |
| F:v_p:14273 | Not assigned |     | 105 |     |     |  |
| F:v_p:14274 | Not assigned |     | 106 |     |     |  |
| F:v_p:14275 | Not assigned |     | 107 |     |     |  |
| F:v_p:14276 | Not assigned |     | 108 |     |     |  |
| F:v_p:14277 | Not assigned |     | 109 |     |     |  |
| F:v_p:14278 | Not assigned |     | 110 |     |     |  |
| F:v_p:14279 | Not assigned |     | 111 |     |     |  |
| F:v_p:14280 | Not assigned | 120 | 112 | 175 |     |  |
| F:v_p:14281 | Not assigned |     | 116 |     |     |  |
| F:v_p:14282 | Not assigned |     | 117 |     |     |  |
| F:v_p:14283 | Not assigned | 135 | 119 | 198 |     |  |
| F:v_p:14284 | Not assigned |     | 121 |     |     |  |
| F:v_p:14285 | Not assigned | 138 | 122 |     |     |  |
| F:v_p:14286 | Not assigned | 140 | 124 | 204 |     |  |
| F:v_p:14287 | Not assigned | 144 | 125 |     |     |  |
| F:v_p:14288 | Not assigned |     | 126 | 211 |     |  |
| F:v_p:14289 | Not assigned | 146 | 127 | 212 |     |  |
| F:v_p:14290 | Not assigned | 155 | 136 | 221 |     |  |
| F:v_p:14291 | Not assigned | 156 | 137 | 222 |     |  |
| F:v_p:14292 | Not assigned | 157 | 138 | 223 |     |  |
| F:v_p:14293 | Not assigned | 160 | 141 |     |     |  |
| F:v_p:14294 | Not assigned | 161 | 142 | 227 |     |  |
| F:v_p:14295 | Not assigned | 162 | 143 | 228 |     |  |
| F:v_p:14296 | Not assigned | 68  | 170 | 231 |     |  |
| F:v_p:14297 | Not assigned |     | 171 | 232 |     |  |
| F:v_p:14298 | Not assigned |     | 173 | 234 |     |  |
| F:v_p:14299 | Not assigned | 85  | 174 | 235 |     |  |
| F:v_p:14300 | Not assigned | 64  | 176 | 238 |     |  |
| F:v_p:14301 | Not assigned |     | 177 | 239 |     |  |
| F:v_p:14302 | Not assigned |     | 179 | 256 |     |  |
| F:v_p:14303 | Not assigned |     | 182 | 244 |     |  |
| F:v_p:14304 | Not assigned |     | 183 | 259 |     |  |
| F:v_p:14305 | Not assigned |     | 184 | 260 |     |  |
| F:v_p:14306 | Not assigned |     | 186 | 262 |     |  |
| F:v_p:14307 | Not assigned |     | 187 | 247 |     |  |
| F:v_p:14308 | Not assigned |     | 166 |     |     |  |
| F:v_p:14309 | Not assigned |     | 167 |     |     |  |
| F:v_p:14310 | Not assigned |     | 197 | 168 |     |  |
| F:v_p:14311 | Not assigned |     | 198 | 169 | 255 |  |
| F:v_p:14312 | Not assigned |     | 199 | 170 | 256 |  |
| F:v_p:14313 | Not assigned |     | 200 | 171 | 257 |  |
| F:v_p:14314 | Not assigned |     | 201 | 172 | 259 |  |
| F:v_p:14315 | Not assigned |     |     | 173 |     |  |
| F:v_p:14316 | Not assigned |     | 208 | 177 | 271 |  |
| F:v_p:14317 | Not assigned |     |     | 183 |     |  |
| F:v_p:14318 | Not assigned |     |     | 185 |     |  |
| F:v_p:14319 | Not assigned |     | 222 | 186 | 283 |  |
| F:v_p:14320 | Not assigned |     |     | 187 |     |  |
| F:v_p:14321 | Not assigned |     | 225 | 189 | 288 |  |
| F:v_p:14322 | Not assigned |     |     | 190 |     |  |
| F:v_p:14323 | Not assigned |     |     | 191 |     |  |
| F:v_p:14324 | Not assigned |     | 226 | 192 | 292 |  |
| F:v_p:14325 | Not assigned |     |     | 193 |     |  |
| F:v_p:14326 | Not assigned |     |     | 194 |     |  |
| F:v_p:14327 | Not assigned |     |     | 195 |     |  |
| F:v_p:14328 | Not assigned |     | 228 | 196 |     |  |
| F:v_p:14329 | Not assigned |     | 230 | 198 | 295 |  |
| F:v_p:14330 | Not assigned |     | 231 | 199 | 296 |  |
| F:v_p:14331 | Not assigned |     | 232 | 200 | 297 |  |
| F:v_p:14332 | Not assigned |     | 235 | 201 | 298 |  |
| F:v_p:14333 | Not assigned |     |     | 202 |     |  |
| F:v_p:14334 | Not assigned |     |     | 204 |     |  |
| F:v_p:14335 | Not assigned |     |     | 205 |     |  |
| F:v_p:14336 | Not assigned |     |     | 206 | 311 |  |
| F:v_p:14337 | Not assigned |     |     | 208 |     |  |
| F:v_p:14338 | Not assigned |     | 246 | 210 |     |  |
| F:v_p:14339 | Not assigned |     |     | 211 |     |  |
| F:v_p:14340 | Not assigned |     |     | 212 |     |  |
| F:v_p:14341 | Not assigned |     |     | 213 |     |  |
| F:v_p:14342 | Not assigned |     |     | 215 |     |  |
| F:v_p:14343 | Not assigned |     | 256 | 216 |     |  |
| F:v_p:14344 | Not assigned |     |     | 217 |     |  |
| F:v_p:14345 | Not assigned |     |     | 218 |     |  |
| F:v_p:14346 | Not assigned |     |     | 219 |     |  |
| F:v_p:14347 | Not assigned |     |     | 220 |     |  |

|             |              |     |     |     |     |    |
|-------------|--------------|-----|-----|-----|-----|----|
| F:v_p:14348 | Not assigned |     | 221 |     |     |    |
| F:v_p:14349 | Not assigned |     | 222 |     |     |    |
| F:v_p:14350 | Not assigned | 264 | 223 | 337 |     |    |
| F:v_p:14351 | Not assigned | 265 | 224 | 338 |     |    |
| F:v_p:14352 | Not assigned |     | 225 |     |     |    |
| F:v_p:14353 | Not assigned |     | 226 |     |     |    |
| F:v_p:14354 | Not assigned |     | 227 |     |     |    |
| F:v_p:14355 | Not assigned |     | 228 |     |     |    |
| F:v_p:14356 | Not assigned | 269 | 229 | 343 |     |    |
| F:v_p:14357 | Not assigned |     | 230 |     |     |    |
| F:v_p:14358 | Not assigned |     | 231 |     |     |    |
| F:v_p:14359 | Not assigned |     | 232 |     |     |    |
| F:v_p:14360 | Not assigned |     | 233 |     |     |    |
| F:v_p:14361 | Not assigned |     | 234 |     |     |    |
| F:v_p:14362 | Not assigned |     | 236 |     |     |    |
| F:v_p:14363 | Not assigned |     | 237 |     |     |    |
| F:v_p:14364 | Not assigned |     | 238 |     |     |    |
| F:v_p:14365 | Not assigned |     | 239 |     |     |    |
| F:v_p:14366 | Not assigned |     | 240 |     |     |    |
| F:v_p:14367 | Not assigned |     | 241 |     |     |    |
| F:v_p:14368 | Not assigned |     | 242 |     |     |    |
| F:v_p:14369 | Not assigned |     | 243 |     |     |    |
| F:v_p:14370 | Not assigned | 240 | 244 |     |     |    |
| F:v_p:14371 | Not assigned | 301 | 246 | 325 |     |    |
| F:v_p:14372 | Not assigned |     | 247 |     |     |    |
| F:v_p:14373 | Not assigned | 303 | 248 |     |     |    |
| F:v_p:14374 | Not assigned |     | 249 |     |     |    |
| F:v_p:14375 | Not assigned |     | 251 |     |     |    |
| F:v_p:14376 | Not assigned |     | 252 |     |     |    |
| F:v_p:14377 | Not assigned |     | 253 |     |     |    |
| F:v_p:14378 | Not assigned |     | 254 |     |     |    |
| F:v_p:14379 | Not assigned |     | 255 |     |     |    |
| F:v_p:14380 | Not assigned |     | 256 |     |     |    |
| F:v_p:14381 | Not assigned |     | 259 |     |     |    |
| F:v_p:14382 | Not assigned |     | 260 |     |     |    |
| F:v_p:14383 | Not assigned |     | 261 |     |     |    |
| F:v_p:14384 | Not assigned |     | 262 |     |     |    |
| F:v_p:14385 | Not assigned |     | 263 |     |     |    |
| F:v_p:14386 | Not assigned |     | 264 | 396 |     |    |
| F:v_p:14387 | Not assigned | 324 | 265 |     |     |    |
| F:v_p:14388 | Not assigned | 326 | 266 | 398 |     |    |
| F:v_p:14389 | Not assigned | 348 | 267 |     |     |    |
| F:v_p:14390 | Not assigned | 327 | 268 | 401 |     |    |
| F:v_p:14391 | Not assigned |     | 269 |     |     |    |
| F:v_p:14392 | Not assigned |     | 270 |     |     |    |
| F:v_p:14393 | Not assigned |     | 271 |     |     |    |
| F:v_p:14394 | Not assigned | 328 | 272 | 324 |     |    |
| F:v_p:14395 | Not assigned | 329 | 273 |     |     |    |
| F:v_p:14396 | Not assigned |     | 274 |     |     |    |
| F:v_p:14397 | Not assigned |     | 275 |     |     |    |
| F:v_p:14398 | Not assigned |     | 276 |     |     |    |
| F:v_p:14399 | Not assigned |     | 277 |     |     |    |
| F:v_p:14400 | Not assigned | 334 | 278 |     |     |    |
| F:v_p:14401 | Not assigned |     | 279 |     |     |    |
| F:v_p:14402 | Not assigned |     | 280 |     |     |    |
| F:v_p:14403 | Not assigned |     | 281 |     |     |    |
| F:v_p:14404 | Not assigned | 341 | 282 | 406 |     |    |
| F:v_p:14405 | Not assigned |     | 283 |     |     |    |
| F:v_p:14406 | Not assigned |     | 284 |     |     |    |
| F:v_p:14407 | Not assigned | 346 | 285 |     |     |    |
| F:v_p:14408 | Not assigned | 351 | 287 | 423 |     |    |
| F:v_p:14409 | Not assigned |     | 288 |     |     |    |
| F:v_p:14410 | Not assigned |     | 289 |     |     |    |
| F:v_p:14411 | Not assigned |     | 290 |     |     |    |
| F:v_p:14412 | Not assigned |     | 291 |     |     |    |
| F:v_p:14413 | Not assigned |     | 292 |     |     |    |
| F:v_p:14414 | Not assigned |     | 293 |     |     |    |
| F:v_p:14415 | Not assigned |     | 294 |     |     |    |
| F:v_p:14416 | Not assigned |     | 295 |     |     |    |
| F:v_p:14417 | Not assigned | 360 | 298 |     |     |    |
| F:v_p:14418 | Not assigned |     | 299 |     |     |    |
| F:v_p:14419 | Not assigned | 364 | 300 |     |     |    |
| F:v_p:14422 | Not assigned | 375 | 303 | 455 |     |    |
| F:v_p:14423 | Not assigned | 376 | 304 |     |     |    |
| F:v_p:14520 | Not assigned |     |     |     | 32  | 67 |
| F:v_p:14521 | Not assigned |     |     |     | 196 |    |
| F:v_p:14522 | Not assigned |     |     |     | 33  | 69 |
| F:v_p:14523 | Not assigned |     |     |     | 193 |    |
| F:v_p:14524 | Not assigned |     |     |     | 34  | 70 |
| F:v_p:14525 | Not assigned |     |     |     | 10  |    |
| F:v_p:14526 | Not assigned |     |     |     | 197 |    |
| F:v_p:14527 | Not assigned |     |     |     | 20  | 54 |
| F:v_p:14528 | Not assigned |     |     |     | 1   |    |
| F:v_p:14529 | Not assigned |     |     |     | 140 |    |
| F:v_p:14530 | Not assigned |     |     |     | 26  |    |
| F:v_p:14531 | Not assigned |     |     |     | 200 |    |

|             |              |  |  |  |  |     |     |
|-------------|--------------|--|--|--|--|-----|-----|
| F:v_p:14532 | Not assigned |  |  |  |  | 199 |     |
| F:v_p:14533 | Not assigned |  |  |  |  | 18  |     |
| F:v_p:14534 | Not assigned |  |  |  |  | 142 |     |
| F:v_p:14535 | Not assigned |  |  |  |  | 22  | 56  |
| F:v_p:14536 | Not assigned |  |  |  |  | 189 |     |
| F:v_p:14537 | Not assigned |  |  |  |  | 4   |     |
| F:v_p:14538 | Not assigned |  |  |  |  | 161 |     |
| F:v_p:14539 | Not assigned |  |  |  |  | 141 |     |
| F:v_p:14540 | Not assigned |  |  |  |  | 17  |     |
| F:v_p:14541 | Not assigned |  |  |  |  | 23  | 57  |
| F:v_p:14542 | Not assigned |  |  |  |  | 19  |     |
| F:v_p:14543 | Not assigned |  |  |  |  | 190 | 281 |
| F:v_p:14544 | Not assigned |  |  |  |  | 2   |     |
| F:v_p:14545 | Not assigned |  |  |  |  | 28  | 63  |
| F:v_p:14546 | Not assigned |  |  |  |  | 194 | 295 |
| F:v_p:14547 | Not assigned |  |  |  |  | 177 | 270 |
| F:v_p:14548 | Not assigned |  |  |  |  | 180 | 273 |
| F:v_p:14549 | Not assigned |  |  |  |  | 179 |     |
| F:v_p:14550 | Not assigned |  |  |  |  | 132 |     |
| F:v_p:14551 | Not assigned |  |  |  |  | 136 |     |
| F:v_p:14552 | Not assigned |  |  |  |  | 131 |     |
| F:v_p:14553 | Not assigned |  |  |  |  | 130 |     |
| F:v_p:14554 | Not assigned |  |  |  |  | 129 |     |
| F:v_p:14555 | Not assigned |  |  |  |  | 29  | 64  |
| F:v_p:14556 | Not assigned |  |  |  |  | 158 |     |
| F:v_p:14557 | Not assigned |  |  |  |  | 164 |     |
| F:v_p:14558 | Not assigned |  |  |  |  | 147 |     |
| F:v_p:14559 | Not assigned |  |  |  |  | 145 |     |
| F:v_p:14560 | Not assigned |  |  |  |  | 148 |     |
| F:v_p:14561 | Not assigned |  |  |  |  | 150 |     |
| F:v_p:14562 | Not assigned |  |  |  |  | 42  |     |
| F:v_p:14563 | Not assigned |  |  |  |  | 171 | 261 |
| F:v_p:14564 | Not assigned |  |  |  |  | 46  |     |
| F:v_p:14565 | Not assigned |  |  |  |  | 3   |     |
| F:v_p:14566 | Not assigned |  |  |  |  | 45  | 91  |
| F:v_p:14567 | Not assigned |  |  |  |  | 198 |     |
| F:v_p:14568 | Not assigned |  |  |  |  | 12  |     |
| F:v_p:14569 | Not assigned |  |  |  |  | 176 |     |
| F:v_p:14570 | Not assigned |  |  |  |  | 195 |     |
| F:v_p:14571 | Not assigned |  |  |  |  | 52  | 100 |
| F:v_p:14572 | Not assigned |  |  |  |  | 170 |     |
| F:v_p:14573 | Not assigned |  |  |  |  | 149 |     |
| F:v_p:14574 | Not assigned |  |  |  |  | 159 |     |
| F:v_p:14575 | Not assigned |  |  |  |  | 144 |     |
| F:v_p:14576 | Not assigned |  |  |  |  | 151 |     |
| F:v_p:14577 | Not assigned |  |  |  |  | 143 | 223 |
| F:v_p:14578 | Not assigned |  |  |  |  | 49  |     |
| F:v_p:14579 | Not assigned |  |  |  |  | 94  |     |
| F:v_p:14580 | Not assigned |  |  |  |  | 133 |     |
| F:v_p:14581 | Not assigned |  |  |  |  | 134 |     |
| F:v_p:14582 | Not assigned |  |  |  |  | 135 |     |
| F:v_p:14583 | Not assigned |  |  |  |  | 138 |     |
| F:v_p:14584 | Not assigned |  |  |  |  | 93  |     |
| F:v_p:14585 | Not assigned |  |  |  |  | 96  |     |
| F:v_p:14586 | Not assigned |  |  |  |  | 54  | 102 |
| F:v_p:14587 | Not assigned |  |  |  |  | 7   | 3   |
| F:v_p:14588 | Not assigned |  |  |  |  | 36  |     |
| F:v_p:14589 | Not assigned |  |  |  |  | 41  |     |
| F:v_p:14590 | Not assigned |  |  |  |  | 174 | 267 |
| F:v_p:14591 | Not assigned |  |  |  |  | 178 | 271 |
| F:v_p:14592 | Not assigned |  |  |  |  | 43  |     |
| F:v_p:14593 | Not assigned |  |  |  |  | 82  |     |
| F:v_p:14594 | Not assigned |  |  |  |  | 162 |     |
| F:v_p:14595 | Not assigned |  |  |  |  | 72  |     |
| F:v_p:14596 | Not assigned |  |  |  |  | 172 | 265 |
| F:v_p:14597 | Not assigned |  |  |  |  | 167 |     |
| F:v_p:14598 | Not assigned |  |  |  |  | 160 |     |
| F:v_p:14599 | Not assigned |  |  |  |  | 55  |     |
| F:v_p:14600 | Not assigned |  |  |  |  | 59  | 107 |
| F:v_p:14601 | Not assigned |  |  |  |  | 60  | 108 |
| F:v_p:14602 | Not assigned |  |  |  |  | 61  | 109 |
| F:v_p:14603 | Not assigned |  |  |  |  | 62  |     |
| F:v_p:14604 | Not assigned |  |  |  |  | 63  | 112 |
| F:v_p:14605 | Not assigned |  |  |  |  | 64  |     |
| F:v_p:14606 | Not assigned |  |  |  |  | 65  |     |
| F:v_p:14607 | Not assigned |  |  |  |  | 66  |     |
| F:v_p:14608 | Not assigned |  |  |  |  | 67  |     |
| F:v_p:14609 | Not assigned |  |  |  |  | 70  | 120 |
| F:v_p:14610 | Not assigned |  |  |  |  | 86  |     |
| F:v_p:14611 | Not assigned |  |  |  |  | 48  | 94  |
| F:v_p:14612 | Not assigned |  |  |  |  | 90  |     |
| F:v_p:14613 | Not assigned |  |  |  |  | 128 |     |
| F:v_p:14614 | Not assigned |  |  |  |  | 53  |     |
| F:v_p:14615 | Not assigned |  |  |  |  | 91  |     |
| F:v_p:14616 | Not assigned |  |  |  |  | 127 |     |
| F:v_p:14617 | Not assigned |  |  |  |  | 77  |     |

|                                                |              |                                                                                                                                                                                                                       |                             |                            |                                |                            |                             |
|------------------------------------------------|--------------|-----------------------------------------------------------------------------------------------------------------------------------------------------------------------------------------------------------------------|-----------------------------|----------------------------|--------------------------------|----------------------------|-----------------------------|
| F:v_p:14618                                    | Not assigned |                                                                                                                                                                                                                       |                             |                            |                                | 97                         |                             |
| F:v_p:14619                                    | Not assigned |                                                                                                                                                                                                                       |                             |                            |                                | 73                         |                             |
| F:v_p:14620                                    | Not assigned |                                                                                                                                                                                                                       |                             |                            |                                | 74                         |                             |
| F:v_p:14621                                    | Not assigned |                                                                                                                                                                                                                       |                             |                            |                                | 75                         |                             |
| F:v_p:14622                                    | Not assigned |                                                                                                                                                                                                                       |                             |                            |                                | 105                        |                             |
| F:v_p:14623                                    | Not assigned |                                                                                                                                                                                                                       |                             |                            |                                | 102                        |                             |
| F:v_p:14624                                    | Not assigned |                                                                                                                                                                                                                       |                             |                            |                                | 84                         |                             |
| F:v_p:14625                                    | Not assigned |                                                                                                                                                                                                                       |                             |                            |                                | 79                         |                             |
| F:v_p:14626                                    | Not assigned |                                                                                                                                                                                                                       |                             |                            |                                | 107                        |                             |
| F:v_p:14627                                    | Not assigned |                                                                                                                                                                                                                       |                             |                            |                                | 83                         |                             |
| F:v_p:14628                                    | Not assigned |                                                                                                                                                                                                                       |                             |                            |                                | 81                         |                             |
| F:v_p:14629                                    | Not assigned |                                                                                                                                                                                                                       |                             |                            |                                | 87                         |                             |
| F:v_p:14630                                    | Not assigned |                                                                                                                                                                                                                       |                             |                            |                                | 110                        |                             |
| F:v_p:14631                                    | Not assigned |                                                                                                                                                                                                                       |                             |                            |                                | 109                        | 138                         |
| F:v_p:14632                                    | Not assigned |                                                                                                                                                                                                                       |                             |                            |                                | 111                        |                             |
| F:v_p:14633                                    | Not assigned |                                                                                                                                                                                                                       |                             |                            |                                | 116                        | 145                         |
| F:v_p:14634                                    | Not assigned |                                                                                                                                                                                                                       |                             |                            |                                | 88                         |                             |
| F:v_p:14635                                    | Not assigned |                                                                                                                                                                                                                       |                             |                            |                                | 119                        |                             |
| F:v_p:14636                                    | Not assigned |                                                                                                                                                                                                                       |                             |                            |                                | 120                        |                             |
| F:v_p:14637                                    | Not assigned |                                                                                                                                                                                                                       |                             |                            |                                | 121                        |                             |
| F:v_p:14638                                    | Not assigned |                                                                                                                                                                                                                       |                             |                            |                                | 123                        |                             |
| F:v_p:14639                                    | Not assigned |                                                                                                                                                                                                                       |                             |                            |                                | 126                        |                             |
| F:v_p:14640                                    | Not assigned |                                                                                                                                                                                                                       |                             |                            |                                | 139                        |                             |
| F:v_p:14838                                    | Not assigned |                                                                                                                                                                                                                       |                             |                            | 308                            |                            |                             |
| <b>Uncharacterized protein families (UPFs)</b> |              | <b><math>\phi</math>JM-2012</b>                                                                                                                                                                                       | <b><math>\phi</math>PA3</b> | <b><math>\phi</math>KZ</b> | <b>201<math>\phi</math>2-1</b> | <b><math>\phi</math>EL</b> | <b><math>\phi</math>OBP</b> |
| UPF56                                          |              | ORF91                                                                                                                                                                                                                 |                             |                            |                                |                            | ORF286                      |
| UPF335                                         |              | 48                                                                                                                                                                                                                    |                             |                            | ORF266                         |                            |                             |
| UPF402-410                                     |              | 2,4,5-7,9-14                                                                                                                                                                                                          |                             |                            |                                |                            |                             |
| UPF411                                         |              | 15                                                                                                                                                                                                                    |                             |                            |                                |                            | 272                         |
| UPF412-501                                     |              | 20-22,25-30,32,<br>33,35,36,38-41,45-<br>50,52,54-57,59,60,<br>63,66,69-73,77,78,<br>81-84,86-92,94,97,<br>98,100,101,103-109<br>,111,114,115,118,<br>120-128,130,131,<br>133,135,137-139,<br>142,148,150,154,<br>155 |                             |                            |                                |                            |                             |
| UPF502                                         |              | 156                                                                                                                                                                                                                   |                             |                            |                                |                            | 72                          |
| UPF503-511                                     |              | 159,161-163,165,<br>167-169,172                                                                                                                                                                                       |                             |                            |                                |                            |                             |

<sup>a, b</sup>Protein families and (putative) functions defined in the ACLAME

<sup>c</sup>‘F:v-P’ indicates ‘Family:vir\_proph’.

<sup>d</sup>protein family those unassigned for reasons associated with the algorithm is denoted as “not assigned.”
